# Supplementary material for: Erotic subset for the Nencki Affective Picture System (NAPS ERO): cross-sexual comparison study
Source: Front Psychol. 2015 Sep 10;6:1336. doi: 10.3389/fpsyg.2015.01336 (PMC4564755; doi:10.3389/fpsyg.2015.01336)
Supplement: Supplementary file 3 [file DataSheet1.XLSX]

## Sheet: Notation
Notation	Description
ID	Name identifying each of the images; the name contains the information on the content category name, the ordinal number and the subscript referring to the image orientation (h – horizontal, v - vertical)
Category	Name of the erotic content category, i.e. Opposite-sex Couple, Male Couple, Female Couple, Male, Female
Nr	Ordinal number of the image, as counted separately for each of the content category
V/H	Denotes image orientation: h – horizontal, v - vertical
val_M_HoF	Mean (M) of valence ratings in the homosexual female group, ranging from 1 to 9, where: 1 – very negative emotions, to 9 - very positive emotions
val_SD_HoF	Standard deviation (SD) of valence ratings in the homosexual female group
val_M_HoM	Mean (M) of valence ratings in the homosexual male group, ranging from 1 to 9, where: 1 – very negative emotions, to 9 - very positive emotions
val_SD_HoM	Standard deviation (SD) of valence ratings in the homosexual male group
val_M_HeF	Mean (M) of valence ratings in the heterosexual female group, ranging from 1 to 9, where: 1 – very negative emotions, to 9 - very positive emotions
val_SD_HeF	Standard deviation (SD) of valence ratings in the heterosexual female group
val_M_HeM	Mean (M) of valence ratings in the heterosexual male group, ranging from 1 to 9, where: 1 – very negative emotions, to 9 - very positive emotions
val_SD_HeM	Standard deviation (SD) of valence ratings in the heterosexual male group
aro_M_HoF	Mean (M) of arousal ratings in the homosexual female group, ranging from 1 to 9, where: 1 – weak emotions, being emotionally unaroused, to 9 - strong emotions, being emotionally aroused
aro_SD_HoF	Standard deviation (SD) of arousal ratings in the homosexual female group
aro_M_HoM	Mean (M) of arousal ratings in the homosexual male group, ranging from 1 to 9, where: 1 – weak emotions, being emotionally unaroused, to 9 - strong emotions, being emotionally aroused
aro_SD_HoM	Standard deviation (SD) of arousal ratings in the homosexual male group
aro_M_HeF	Mean (M) of arousal ratings in the heterosexual female group, ranging from 1 to 9, where: 1 – weak emotions, being emotionally unaroused, to 9 - strong emotions, being emotionally aroused
aro_SD_HeF	Standard deviation (SD) of arousal ratings in the heterosexual female group
aro_M_HeM	Mean (M) of arousal ratings in the heterosexual male group, ranging from 1 to 9, where: 1 – weak emotions, being emotionally unaroused, to 9 - strong emotions, being emotionally aroused
aro_SD_HeM	Standard deviation (SD) of arousal ratings in the heterosexual male group
Width	Image width in pixels
Height	Image height in pixels
Luminance	Average pixel values of grayscaled image (PIL library, ver. 1.1.7)
Contrast	Standard deviation of pixel values of grayscaled image (PIL library, ver. 1.1.7)
JPEG_size80	JPEG size as an index of overall complexity of an image. JPEG size was determined for color image with a compression quality setting of 80 on a scale from 1 to 100 (PIL library, ver. 1.1.7). The bigger the JPEG size, the more complex an image
LABL	Average luminance (L*) in the CIE L*a*b* color space (L* = 0 for black and L* = 100 for white pixels) (PIL library, ver. 1.1.7)
LABA	Average a* value in the CIE L*a*b* color space (a* = -100 for green and a* = 100 for red pixels) (PIL library, ver. 1.1.7)
LABB	Average b* value in the CIE L*a*b* color space (b* = -100 for blue and b* = 100 for yellow pixels) (PIL library, ver. 1.1.7)
Entropy	Entropy (H) of grayscaled image, computed from the histogram of 8-bit gray-level intensity values x: H = –Σp(x)log p(x), where p represents the frequency of intensity x (PIL library, ver. 1.1.7). The higher the entropy, the higher the more random the image

## Sheet: Ratings
ID	Category	Nr	V/H	val_M_HoF	val_SD_HoF	aro_M_HoF	aro_SD_HoF	val_M_HoM	val_SD_HoM	aro_M_HoM	aro_SD_HoM	val_M_HeF	val_SD_HeF	aro_M_HeF	aro_SD_HeF	val_M_HeM	val_SD_HeM	aro_M_HeM	aro_SD_HeM
Opposite-sex_couple_001_v.jpg	Opposite-sex Couple	1	v	4.65	1.59852	3.1	2.14966	6.5	1.31789	3.8	2.09259	6.65	1.1821	4.2	1.67332	6.1	0.967906	4.6	1.93037
Opposite-sex_couple_002_h.jpg	Opposite-sex Couple	2	h	5.95	1.2763	3.55	2.30503	6.05	1.14593	2.8	1.36111	6.6	2.08756	5.7	1.89459	6.6	1.0463	4.85	1.75544
Opposite-sex_couple_003_v.jpg	Opposite-sex Couple	3	v	4.05	1.31689	3.05	1.70062	5.8	1.79473	3.8	2.01573	5.25	1.77334	4.05	2.18789	5.45	1.63755	4.55	2.11449
Opposite-sex_couple_004_v.jpg	Opposite-sex Couple	4	v	5.45	1.05006	2.75	1.88833	6.1	1.51831	3.55	1.90498	6.9	1.55259	4.4	2.25715	5.45	1.63755	3.8	1.73509
Opposite-sex_couple_005_h.jpg	Opposite-sex Couple	5	h	4.05	2.2589	4.25	2.4252	6.45	1.43178	5.7	1.83819	6.4	1.75919	5.6	2.21003	6.85	1.95408	6.05	2.28208
Opposite-sex_couple_006_h.jpg	Opposite-sex Couple	6	h	5.65	1.1821	2.75	1.77334	6.55	1.05006	3.6	1.72901	6.75	2.1734	4.25	2.07428	5.5	1.14708	3.35	1.63111
Opposite-sex_couple_007_h.jpg	Opposite-sex Couple	7	h	5.85	1.66307	3.3	2.02874	6.6	1.31389	3.1	1.41049	6.85	1.59852	5.05	1.90498	6.45	1.53811	5.35	1.63111
Opposite-sex_couple_008_h.jpg	Opposite-sex Couple	8	h	5.9	1.83246	3.65	2.18307	5.4	1.31389	3.75	2.35919	6.75	1.48235	5.3	2.17885	6.95	1.05006	5.6	1.53554
Opposite-sex_couple_009_h.jpg	Opposite-sex Couple	9	h	6.1	1.51831	3.6	1.84676	6.1	1.29371	3.5	1.70139	6.95	1.31689	4.95	2.03845	6.5	1.05131	5.1	1.61897
Opposite-sex_couple_010_h.jpg	Opposite-sex Couple	10	h	4.85	1.49649	2.8	1.60918	6.15	1.34849	3.4	1.72901	6.15	1.13671	4.25	1.916	6	1.48678	4.35	2.1095
Opposite-sex_couple_011_h.jpg	Opposite-sex Couple	11	h	5.5	1.76218	3.05	1.93241	6.75	1.33278	3.7	2.07998	7.55	1.31689	4.8	2.16673	6.1	1.11921	4.3	1.78001
Opposite-sex_couple_012_h.jpg	Opposite-sex Couple	12	h	3	2.07745	4.75	2.7314	5.05	1.63755	3.95	2.28208	5.5	2.09008	5.75	1.94327	6.05	1.93241	5.9	1.91669
Opposite-sex_couple_013_h.jpg	Opposite-sex Couple	13	h	4.1	1.94395	3.75	2.19749	6.6	1.6983	5.05	1.82021	5.25	2.0229	5.15	2.53969	4.15	2.25424	5.05	1.90498
Opposite-sex_couple_014_h.jpg	Opposite-sex Couple	14	h	4.2	2.04167	4.3	2.31926	4.45	2.01246	4.6	2.16187	4.9	2.44734	5.25	2.07428	5.45	1.93241	5.3	2.05452
Opposite-sex_couple_015_h.jpg	Opposite-sex Couple	15	h	6.05	0.944513	3.35	2.059	6.65	1.34849	4.05	1.87715	7.4	1.66702	5.35	2.1095	6.55	1.39454	5.05	1.95946
Opposite-sex_couple_016_v.jpg	Opposite-sex Couple	16	v	5.5	1.35724	2.85	1.42441	6.75	0.910465	3.95	1.8489	7.6	1.53554	5.75	2.14905	6.5	1.46898	4.65	2.20705
Opposite-sex_couple_017_v.jpg	Opposite-sex Couple	17	v	5.15	1.66307	3.15	1.8432	6.45	1.43178	3.75	1.916	6.95	1.70062	5.8	2.14231	6.8	1.36111	5.55	1.66938
Opposite-sex_couple_018_h.jpg	Opposite-sex Couple	18	h	3.1	2.04939	3.95	2.58488	6.3	1.62546	5.15	2.15883	5.2	2.50473	6.25	1.83174	5.1	1.80351	4.95	2.08945
Opposite-sex_couple_019_v.jpg	Opposite-sex Couple	19	v	6.9	1.11921	3.25	2.31414	7.55	1.19097	4.95	2.30503	7.9	1.25237	5.7	2.17885	6.35	1.34849	4.2	1.90843
Opposite-sex_couple_020_h.jpg	Opposite-sex Couple	20	h	6	1.25656	3.4	1.72901	6.55	1.35627	3.7	1.68897	7	1.21395	5.6	1.84676	6.3	1.30182	4.95	1.8489
Opposite-sex_couple_021_h.jpg	Opposite-sex Couple	21	h	5.35	0.988087	2.5	1.5728	6.7	1.08094	3.55	1.57196	6.95	1.60509	4.35	2.03328	5.95	1.05006	4.15	1.53125
Opposite-sex_couple_022_v.jpg	Opposite-sex Couple	22	v	5.45	1.05006	2.95	1.63755	6.3	1.38031	3.35	1.98083	6.3	1.49032	4.5	1.70139	6.05	1.23438	4.3	1.94936
Opposite-sex_couple_023_h.jpg	Opposite-sex Couple	23	h	5.55	1.19097	4.15	2.15883	6.25	1.37171	3.85	2.23077	6.65	1.66307	5.55	2.21181	6.7	1.34164	5.25	2.24488
Opposite-sex_couple_024_h.jpg	Opposite-sex Couple	24	h	5.45	2.18789	4.4	2.03651	5.1	1.44732	3.75	1.77334	6.45	1.98614	5.75	2.07428	6.75	1.44641	5.6	2.11262
Opposite-sex_couple_025_h.jpg	Opposite-sex Couple	25	h	4.4	2.34857	4.45	2.32775	5.1	1.77408	4.35	2.23077	5.6	2.06219	5.5	2.18849	7.3	1.30182	6.4	2.23371
Opposite-sex_couple_026_h.jpg	Opposite-sex Couple	26	h	5.5	1.76218	3.05	2.21181	6.2	1.47256	3.35	1.78517	7.05	1.5035	4.55	2.2589	6.1	1.16529	3.65	1.81442
Opposite-sex_couple_027_h.jpg	Opposite-sex Couple	27	h	5.45	0.998683	2.4	1.63514	6.25	1.16416	2.6	1.42902	6.35	1.63111	4.1	2.19809	5.75	0.786398	3.65	1.66307
Opposite-sex_couple_028_h.jpg	Opposite-sex Couple	28	h	5.3	1.34164	3	1.80642	6.35	1.1821	3.2	1.85245	6.75	1.55174	4.6	2.23371	5.85	1.34849	3.55	1.8489
Opposite-sex_couple_029_h.jpg	Opposite-sex Couple	29	h	4.05	1.70062	3.3	2.17885	5.7	1.59275	3.35	1.75544	5.55	2.03845	4.75	2.0995	4.7	1.30182	4.05	2.01246
Opposite-sex_couple_030_v.jpg	Opposite-sex Couple	30	v	5.35	1.59852	3.55	2.23548	6.15	1.34849	3.25	1.55174	5.85	1.7252	4.3	2.02874	5.6	1.35336	4.3	1.68897
Opposite-sex_couple_031_h.jpg	Opposite-sex Couple	31	h	4.9	1.48324	2.65	1.75544	6.05	1.35627	2.85	1.63111	6.2	1.70448	3.95	2.1637	5.2	1.57614	3.75	1.58529
Opposite-sex_couple_032_h.jpg	Opposite-sex Couple	32	h	5.55	1.43178	2.75	1.88833	6.45	1.39454	3.35	1.42441	6.6	1.53554	4.65	2.30046	5.85	1.22582	3.75	1.48235
Opposite-sex_couple_033_v.jpg	Opposite-sex Couple	33	v	5.4	1.72901	2.7	2.00263	6.6	1.14248	3.95	2.30503	7.05	2.11449	5	2.31699	6.2	1.76516	4.75	1.71295
Opposite-sex_couple_034_h.jpg	Opposite-sex Couple	34	h	5	1.68585	2.6	1.3917	5.75	1.51744	2.95	1.57196	5.75	1.71295	3.5	2.01311	5.2	1.43637	3.4	1.50088
Opposite-sex_couple_035_h.jpg	Opposite-sex Couple	35	h	6	0.917663	2.8	1.79473	6.8	1.15166	3.55	1.57196	7	1.80642	5.05	2.01246	6.3	1.30182	4.15	1.7252
Opposite-sex_couple_036_h.jpg	Opposite-sex Couple	36	h	5.25	1.77334	2.9	1.86096	6.3	1.30182	3	1.62221	6.5	1.35724	4.3	2.25015	5.55	1.19097	3.1	1.48324
Opposite-sex_couple_037_h.jpg	Opposite-sex Couple	37	h	5.75	1.55174	3	1.89181	6.4	1.27321	3.1	1.55259	6.8	1.70448	4.4	2.25715	6	0.858395	3.95	1.8489
Opposite-sex_couple_038_h.jpg	Opposite-sex Couple	38	h	5.75	1.40955	2.7	1.78001	6.4	1.18766	3.1	1.16529	7.1	1.25237	4.7	2.27342	6	1.1239	3.95	1.73129
Opposite-sex_couple_039_h.jpg	Opposite-sex Couple	39	h	5.9	0.967906	2.75	1.55174	6.65	1.30888	3.6	1.60263	6.65	1.8432	4.8	1.96281	6	1.29777	3.8	1.76516
Opposite-sex_couple_040_v.jpg	Opposite-sex Couple	40	v	5.35	1.78517	3.05	1.82021	6.15	1.03999	3.7	1.17429	6.3	1.80933	4.7	2.15455	5.35	1.26803	3.7	1.45458
Opposite-sex_couple_041_v.jpg	Opposite-sex Couple	41	v	5.55	1.60509	2.45	1.53811	6.45	1.19097	3.05	1.57196	6.7	1.59275	3.7	2.12999	5.85	1.34849	3.4	2.16187
Opposite-sex_couple_042_h.jpg	Opposite-sex Couple	42	h	5.8	1.00525	3.05	1.73129	6.7	1.26074	3.7	1.89459	7.1	1.55259	4.9	2.33734	6.45	1.2763	4.35	1.87153
Opposite-sex_couple_043_v.jpg	Opposite-sex Couple	43	v	4.65	1.87153	3.35	1.98083	5.45	1.14593	2.55	1.57196	6.2	1.57614	4.8	2.04167	5.3	1.59275	4	1.77705
Opposite-sex_couple_044_h.jpg	Opposite-sex Couple	44	h	5.95	1.39454	2.95	1.95946	6.6	1.0463	3.15	1.75544	7.15	1.49649	4.55	2.58488	6.1	0.91191	3.8	1.64157
Opposite-sex_couple_045_h.jpg	Opposite-sex Couple	45	h	5.25	1.01955	2.75	1.61815	5.9	1.20961	3	1.33771	5.8	1.88065	4.85	1.81442	5.15	1.34849	3.9	1.55259
Opposite-sex_couple_046_h.jpg	Opposite-sex Couple	46	h	5.45	1.09904	2.8	1.73509	6.25	1.20852	2.95	1.35627	6.9	1.41049	4.5	2.13985	5.65	0.988087	3.4	1.78885
Opposite-sex_couple_047_v.jpg	Opposite-sex Couple	47	v	5.25	1.44641	2.7	1.71985	6.25	1.20852	3.05	1.39454	6.8	1.73509	5.15	2.66112	6.25	1.65036	4.35	1.92696
Opposite-sex_couple_048_h.jpg	Opposite-sex Couple	48	h	5.15	1.56525	2.7	1.78001	6	1.1239	2.95	1.5035	6.75	1.48235	5.2	2.26181	5.75	1.16416	3.9	1.77408
Opposite-sex_couple_049_h.jpg	Opposite-sex Couple	49	h	5.85	0.812728	3	1.89181	6.3	1.45458	3.75	2.07428	7.15	1.38697	4.65	2.23077	5.85	1.1821	4	1.80642
Opposite-sex_couple_050_h.jpg	Opposite-sex Couple	50	h	5.45	1.19097	2.65	1.59852	6.1	1.20961	2.8	1.23969	6.9	1.58612	4.65	2.13431	5.95	1.14593	4.05	1.8489
Male_couple_001_v.jpg	Male Couple	1	v	4.7	2.20287	3.3	2.05452	5.7	1.94936	4.15	2.1095	5.25	2.8261	4.65	2.43386	4.65	1.7252	3.5	1.5728
Male_couple_002_h.jpg	Male Couple	2	h	6.25	1.88833	3.55	2.35025	7.8	0.951453	6.35	1.46089	4.65	1.92696	4.05	1.82021	3.65	1.63111	4.1	1.77408
Male_couple_003_v.jpg	Male Couple	3	v	6.2	2.06729	3.55	2.2589	7.05	1.2763	4.95	1.95946	5.25	2.48945	4.25	2.29129	3.75	1.44641	3.8	1.90843
Male_couple_004_v.jpg	Male Couple	4	v	4.3	1.8666	2.85	1.95408	6.3	1.71985	4.35	2.23077	4.15	2.0844	3.5	2.01311	3.2	1.32188	4.15	1.8432
Male_couple_005_h.jpg	Male Couple	5	h	5.25	1.916	2.95	1.93241	7.3	1.12858	4.5	2.23607	4.7	1.92217	4.2	1.90843	3.75	1.68195	3.65	2.1095
Male_couple_006_h.jpg	Male Couple	6	h	6.25	1.88833	3.55	2.11449	7.6	1.14248	5.35	2.30046	5.6	1.93037	4	2.17643	4.65	1.03999	2.9	1.48324
Male_couple_007_v.jpg	Male Couple	7	v	5.05	1.87715	3.4	2.06219	7.65	1.42441	5.85	2.13431	5.25	1.916	4.4	2.08756	4.2	2.09259	4.05	2.18789
Male_couple_008_h.jpg	Male Couple	8	h	5.9	1.83246	3.1	2.02355	7.25	1.16416	4.3	2.05452	5.3	1.97617	3.2	1.57614	4.45	1.46808	3.25	1.58529
Male_couple_009_v.jpg	Male Couple	9	v	3.65	1.92696	3.7	2.51522	6.4	1.09545	5.3	1.80933	3.7	2.05452	4.8	2.09259	2.35	1.38697	5.4	2.34857
Male_couple_010_h.jpg	Male Couple	10	h	4.55	1.87715	3.1	1.99737	7.15	1.30888	4.9	1.44732	4.35	2.32322	4.6	2.28035	3.1	1.16529	4	2.07745
Male_couple_011_v.jpg	Male Couple	11	v	4.65	1.7252	2.9	1.55259	7	1.33771	5.7	1.92217	4.4	2.28035	4.55	1.76143	3.7	1.34164	3.95	2.03845
Male_couple_012_v.jpg	Male Couple	12	v	5.35	1.89945	2.65	1.56525	7.5	1.23544	6	2.10263	5.2	1.88065	3.85	1.26803	3.9	1.29371	3.7	1.94936
Male_couple_013_h.jpg	Male Couple	13	h	6.6	1.95744	4.1	2.69307	7.95	1.14593	5.85	2.00722	6.05	1.66938	4.1	1.97084	4.6	1.95744	3.55	1.76143
Male_couple_014_h.jpg	Male Couple	14	h	4.6	1.81804	3	2.05196	7.4	1.23117	6.2	1.90843	4.15	2.75824	5.15	1.98083	2.6	1.3917	5.6	2.50053
Male_couple_015_v.jpg	Male Couple	15	v	3.2	1.79473	4.8	2.91277	6.8	1.23969	5.65	1.87153	4.2	2.23842	5.95	1.76143	3.15	2.20705	5.6	2.08756
Male_couple_016_h.jpg	Male Couple	16	h	5.55	1.73129	3	1.74718	7.95	0.887041	6.85	1.95408	4.7	2.31926	4.25	2.55209	3.25	1.68195	4.1	2.19809
Male_couple_017_h.jpg	Male Couple	17	h	4.45	1.8489	2.95	1.87715	6.25	1.58529	3.85	1.75544	4.1	2.19809	3.9	2.29186	3.75	1.48235	4.5	1.76218
Male_couple_018_h.jpg	Male Couple	18	h	6.7	1.92217	3.9	2.5319	7.55	1.14593	4.8	2.1176	5.75	2.0995	3.95	2.35025	4.5	1.35724	2.8	1.73509
Male_couple_019_h.jpg	Male Couple	19	h	3.85	1.92696	4.05	2.81864	6.55	1.53811	5	1.91943	3.85	2.03328	4.8	2.04167	2.85	2.03328	5.4	2.52149
Male_couple_020_h.jpg	Male Couple	20	h	3.45	2.21181	4.75	2.89964	5.15	2.30046	5.6	1.78885	3.4	2.13739	5.5	2.56495	1.85	1.03999	6.95	1.82021
Male_couple_021_h.jpg	Male Couple	21	h	6.35	1.89945	3.1	1.99737	7.8	1.15166	5.65	2.30046	5.85	2.3681	4.4	2.34857	4	1.71679	3.65	1.49649
Male_couple_022_v.jpg	Male Couple	22	v	4.65	1.98083	3.9	2.29186	6.7	1.71985	5.9	1.80351	4.65	2.13431	5.25	2.04875	3.35	1.92696	4.85	2.059
Male_couple_023_v.jpg	Male Couple	23	v	3.45	1.95946	4.6	2.81724	7.15	1.69442	6.65	2.1095	4.35	2.53969	5.3	2.02874	1.95	1.23438	6.6	2.06219
Male_couple_024_h.jpg	Male Couple	24	h	4.55	1.31689	3.1	1.99737	7.2	1.00525	5.6	1.84676	6.55	1.5035	5.3	1.97617	4.45	1.82021	4.15	2.23077
Male_couple_025_v.jpg	Male Couple	25	v	3.9	2.04939	3.05	2.39462	7.4	1.42902	5.9	2.44734	4.8	2.41922	5	2.12751	2.4	1.18766	5.15	2.41214
Male_couple_026_v.jpg	Male Couple	26	v	4.8	1.96281	3.25	2.61323	4.95	1.8489	4	2.47088	4.35	2.13431	3.75	1.71295	3.15	1.42441	4.1	2.2219
Male_couple_027_h.jpg	Male Couple	27	h	5.15	1.69442	2.7	1.75019	6.5	1.14708	3.7	1.55935	4.3	2.15455	3.65	1.95408	3.2	1.39925	3.95	2.21181
Male_couple_028_h.jpg	Male Couple	28	h	5.3	1.78001	3.15	1.81442	6.55	1.05006	3.45	1.63755	5.45	2.08945	4.25	2.53138	4	1.37649	3.55	2.0641
Male_couple_029_h.jpg	Male Couple	29	h	5.5	1.9868	2.65	1.59852	7.25	1.25132	5.35	2.00722	4.65	2.32322	3.75	1.83174	3.6	1.09545	3.6	1.98415
Male_couple_030_v.jpg	Male Couple	30	v	4.65	1.81442	2.9	1.97084	6.55	1.39454	3.95	2.32775	3.95	2.13923	4.35	2.20705	3.2	1.39925	4.3	2.34184
Male_couple_031_h.jpg	Male Couple	31	h	5.6	1.90291	3.1	1.88903	6.95	0.944513	4.3	1.65752	4.65	1.81442	3.65	2.00722	3.55	1.14593	3.75	2.24488
Male_couple_032_h.jpg	Male Couple	32	h	5.05	2.11449	3.45	2.01246	6.35	1.34849	4.15	1.66307	4.3	2.07998	4.15	2.23077	3.05	1.5035	4.15	2.059
Male_couple_033_v.jpg	Male Couple	33	v	5.35	1.66307	3.15	1.8432	7.3	1.21828	4.95	2.18789	5.65	1.63111	3.95	1.66938	3.8	1.50787	3.95	2.13923
Male_couple_034_h.jpg	Male Couple	34	h	4.5	1.76218	3.1	1.58612	6.45	1.23438	4.7	2.17885	4.4	2.18608	4.05	2.03845	3	1.33771	4	2.15211
Male_couple_035_h.jpg	Male Couple	35	h	5.8	1.79473	2.65	1.49649	6.6	1.18766	3.6	1.6983	4.75	2.12442	3.3	2.07998	3.8	1.23969	3.75	2.12442
Male_couple_036_h.jpg	Male Couple	36	h	5.15	1.81442	3.3	1.80933	6.8	1.28145	3.95	2.08945	4.65	1.98083	3.9	2.07491	3.45	1.31689	3.8	1.82382
Male_couple_037_v.jpg	Male Couple	37	v	5.55	1.66938	2.7	1.68897	7.6	0.88258	5.75	1.55174	4.95	2.0641	3.8	1.82382	3.9	1.25237	2.95	1.63755
Male_couple_038_v.jpg	Male Couple	38	v	4.75	2.07428	3.55	2.03845	5.15	2.059	4.1	1.91669	3.55	2.74293	5.1	1.99737	2.85	1.59852	4.75	2.53138
Male_couple_039_h.jpg	Male Couple	39	h	5.8	1.82382	3	1.94666	7.15	1.03999	4.7	1.89459	4.8	2.09259	4	2.07745	3.55	1.23438	3.8	2.01573
Male_couple_040_h.jpg	Male Couple	40	h	5.4	1.50088	2.75	1.83174	6.3	1.08094	3.4	1.50088	4.55	1.87715	3.3	1.65752	3.25	1.44641	4	1.71679
Male_couple_041_h.jpg	Male Couple	41	h	4.95	1.8489	3.1	2.29186	6.75	1.29269	3.9	2.12504	4.7	2.40832	4.35	2.1095	2.65	1.08942	3.9	2.12504
Male_couple_042_h.jpg	Male Couple	42	h	5.55	1.73129	2.85	1.78517	6.45	0.998683	3.3	1.55935	4.8	2.33057	3.75	1.916	3.6	1.18766	3.45	2.13923
Male_couple_043_v.jpg	Male Couple	43	v	5.6	1.60263	3.35	2.13431	7.25	1.33278	4.7	2.12999	5.05	2.30503	3.95	2.18789	3.4	1.14248	3.9	1.91669
Male_couple_044_h.jpg	Male Couple	44	h	5.25	2.19749	3.45	2.1637	7.15	1.22582	4.75	1.83174	5.05	2.35025	4	2.02614	3.15	1.38697	4.45	2.21181
Male_couple_045_h.jpg	Male Couple	45	h	5.9	1.68273	3.1	2.14966	6.95	1.19097	3.95	1.82021	5.15	2.15883	3.55	1.79106	3.55	1.23438	3.55	1.8489
Male_couple_046_h.jpg	Male Couple	46	h	5.35	1.81442	2.8	1.54238	7.25	1.20852	4.55	2.13923	5.25	2.0229	3.75	1.71295	3.7	1.38031	3.45	1.70062
Male_couple_047_h.jpg	Male Couple	47	h	6	1.89181	3.1	1.88903	7.5	1.10024	5.2	2.19089	4.95	2.01246	4.1	1.94395	3.65	1.13671	3.55	2.0641
Male_couple_048_h.jpg	Male Couple	48	h	4.65	1.92696	3.1	2.19809	5.85	1.30888	4.1	1.80351	4.45	1.98614	3.7	1.8666	3.2	1.15166	4.25	2.3814
Male_couple_049_h.jpg	Male Couple	49	h	6.45	2.01246	3.55	2.1637	7.05	1.09904	4.5	2.1643	5.25	2.48945	3.4	2.21003	3.65	1.38697	3.35	1.87153
Male_couple_050_h.jpg	Male Couple	50	h	5.2	1.64157	2.75	1.83174	6.6	1.09545	3.6	1.81804	4.7	2.05452	3.6	1.93037	3.65	1.1821	3.55	2.03845
Female_couple_001_h.jpg	Female Couple	1	h	5.15	1.49649	3.15	2.18307	5.6	1.53554	2.9	1.94395	4.9	1.86096	3.65	2.00722	6.15	1.59852	4.45	2.13923
Female_couple_002_v.jpg	Female Couple	2	v	7.7	1.26074	5.85	2.15883	5.2	1.57614	3.3	2.29645	5.05	1.57196	4.15	1.59852	6.8	1.57614	5.75	2.04875
Female_couple_003_h.jpg	Female Couple	3	h	7.45	1.60509	5.65	2.62127	5.9	1.37267	2.85	1.38697	5.85	1.81442	3.95	2.4165	6.3	1.52523	4.9	2.48998
Female_couple_004_h.jpg	Female Couple	4	h	5.4	2.16187	4.25	2.63329	4.5	1.82093	3.5	2.06474	4.1	1.97084	4.45	1.82021	6.6	1.63514	5.2	2.1176
Female_couple_005_v.jpg	Female Couple	5	v	5	2.05196	3.6	2.03651	4.95	1.87715	4.2	2.70672	3.95	2.1637	4.6	1.98415	3.8	1.10501	4.15	1.78517
Female_couple_006_v.jpg	Female Couple	6	v	6.5	1.46898	4.45	2.28208	5.85	1.49649	3.3	1.75019	4.2	2.06729	3.7	1.55935	5.55	2.2589	4.85	1.95408
Female_couple_007_v.jpg	Female Couple	7	v	5.9	1.94395	3.25	1.77334	6	1.68585	2.7	1.17429	4.9	1.94395	3.6	1.78885	4.5	1.39548	3.2	1.67332
Female_couple_008_v.jpg	Female Couple	8	v	7.05	1.2763	5	2.20048	5.7	1.62546	3.2	1.90843	4.9	1.77408	4	2.02614	7	1.48678	6	2.12751
Female_couple_009_v.jpg	Female Couple	9	v	6.1	2.24546	5.3	2.4942	4.55	1.82021	3.95	2.39462	4.1	2.35975	4.85	2.1095	6.6	1.87504	6.15	1.78517
Female_couple_010_h.jpg	Female Couple	10	h	7.55	1.19097	6.2	2.19089	5.25	1.74341	3.95	2.2589	5.3	1.8666	3.8	1.50787	6.9	1.74416	5.65	2.15883
Female_couple_011_v.jpg	Female Couple	11	v	5.65	1.26803	3.75	2.35919	4.7	1.75019	3.3	1.94936	3.55	1.63755	3.8	2.21478	5.3	1.80933	5	2.05196
Female_couple_012_v.jpg	Female Couple	12	v	7.5	1.39548	5.3	2.31926	6.3	1.26074	2.95	1.35627	5.7	1.80933	3.65	1.98083	5.25	1.48235	3.4	2.0105
Female_couple_013_h.jpg	Female Couple	13	h	7	0.917663	4.95	2.48098	5.5	1.23544	2.45	1.14593	5.5	2.13985	4.05	2.21181	5.95	1.76143	4.6	1.98415
Female_couple_014_v.jpg	Female Couple	14	v	7.5	1.05131	5.65	2.20705	4.9	1.83246	3.8	2.37531	4.85	1.81442	4.5	2.06474	6.85	1.81442	5.55	2.4165
Female_couple_015_h.jpg	Female Couple	15	h	6.7	1.55935	5.5	2.64575	4.2	1.70448	3.55	2.30503	3.95	2.11449	5.25	2.0995	6.2	1.82382	5.7	2.05452
Female_couple_016_v.jpg	Female Couple	16	v	7.8	1.43637	5.5	2.32832	6.75	1.61815	4.25	1.80278	6.4	1.6983	4.25	2.1734	5.25	1.80278	3.45	2.08945
Female_couple_017_h.jpg	Female Couple	17	h	6.65	1.34849	4.45	2.39462	5.75	1.11803	2.5	1.50438	5.85	1.98083	4.5	2.06474	6.3	1.52523	4.9	2.19809
Female_couple_018_h.jpg	Female Couple	18	h	6.7	1.30182	4.5	2.18849	5.8	1.47256	3.4	1.56945	6.8	1.50787	5.05	2.18789	5.6	2.03651	5.1	2.10013
Female_couple_019_h.jpg	Female Couple	19	h	6.65	1.69442	5.35	2.27746	5	1.74718	3	1.80642	5.3	2.25015	5.15	2.25424	6.65	1.59852	5.25	2.19749
Female_couple_020_h.jpg	Female Couple	20	h	7.15	1.75544	4.8	2.30788	5.85	1.89945	3.45	2.13923	5.05	2.23548	4.1	1.94395	5.8	1.00525	4.05	1.63755
Female_couple_021_h.jpg	Female Couple	21	h	7.55	1.09904	4.65	2.47673	6.45	1.46808	3.15	1.63111	5.7	1.78001	4.05	2.13923	5.25	0.910465	2.85	1.69442
Female_couple_022_h.jpg	Female Couple	22	h	7.6	1.3917	6.1	2.57314	5.45	1.39454	2.55	1.23438	5.55	1.79106	4.3	1.89459	6.6	1.31389	5.45	1.76143
Female_couple_023_h.jpg	Female Couple	23	h	7.55	1.53811	5.95	2.11449	4.95	1.53811	3.9	2.38195	5.15	2.00722	4.9	1.74416	6.9	1.61897	6.25	1.71295
Female_couple_024_h.jpg	Female Couple	24	h	8.05	1.19097	5.05	2.54383	6.9	1.68273	4.5	2.50263	7	1.74718	4.4	2.28035	6.15	1.30888	3.8	2.1176
Female_couple_025_h.jpg	Female Couple	25	h	4.35	1.89945	4.95	2.4165	3.65	1.30888	3.75	2.12442	3.8	2.33057	5.65	2.3681	6.05	2.18789	5.7	2.47301
Female_couple_026_h.jpg	Female Couple	26	h	6.25	1.61815	4	2.10263	5.8	1.36111	3	1.48678	4.85	1.89945	3.6	1.87504	4.85	1.22582	3.3	1.65752
Female_couple_027_v.jpg	Female Couple	27	v	5.4	1.98415	4.15	2.53969	5.55	1.43178	3.45	2.0641	5.6	1.78885	3.95	1.93241	4.35	1.53125	3.9	2.07491
Female_couple_028_h.jpg	Female Couple	28	h	7.4	1.3917	5.3	2.43007	6.2	1.23969	2.85	1.38697	5.25	1.916	4	1.77705	5.4	1.53554	3.75	1.99671
Female_couple_029_h.jpg	Female Couple	29	h	6.15	1.7252	3.9	2.57314	6.7	1.30182	3	1.71679	5.5	2.21241	3.95	2.23548	4.8	1.32188	3.3	1.30182
Female_couple_030_h.jpg	Female Couple	30	h	6.75	1.16416	3.5	1.93309	6.4	1.31389	2.65	1.03999	5.35	1.69442	3.75	1.86025	4.85	1.59852	3.55	1.60509
Female_couple_031_v.jpg	Female Couple	31	v	7.45	1.19097	5.2	2.28496	6.05	1.39454	2.85	1.49649	5.2	1.98945	3.35	2.059	5.45	1.43178	3.75	1.65036
Female_couple_032_v.jpg	Female Couple	32	v	7.35	1.42441	5	2.42791	6.75	1.51744	2.95	1.46808	5.3	1.62546	3.1	1.29371	4.95	1.31689	3.2	1.57614
Female_couple_033_h.jpg	Female Couple	33	h	6.75	1.44641	4.6	2.08756	5.7	1.38031	2.35	0.988087	4.75	1.88833	3.15	1.69442	5.65	1.22582	3.75	1.37171
Female_couple_034_h.jpg	Female Couple	34	h	7.15	1.34849	4.9	2.42574	6.1	1.20961	2.8	1.32188	5.1	1.86096	3.55	1.8489	4.8	1.19649	2.75	1.37171
Female_couple_035_v.jpg	Female Couple	35	v	7	1.21395	4.2	2.23842	6.4	1.27321	3.05	1.2763	5.3	1.65752	3.7	1.45458	4.75	1.29269	3.35	1.53125
Female_couple_036_h.jpg	Female Couple	36	h	6.65	1.08942	3.95	2.32775	5.4	1.53554	2.65	1.59852	4.6	1.50088	3.45	1.82021	4.55	1.09904	3.45	1.43178
Female_couple_037_v.jpg	Female Couple	37	v	7.25	1.06992	4.95	2.0641	6.25	1.71295	2.8	1.32188	4.85	1.75544	3.25	1.51744	5.35	1.46089	4.1	1.94395
Female_couple_038_h.jpg	Female Couple	38	h	6.75	1.37171	4.65	2.3681	6.25	1.37171	3.1	1.44732	5.3	1.78001	3.65	1.87153	5.15	1.13671	3.45	2.08945
Female_couple_039_h.jpg	Female Couple	39	h	6.75	1.25132	4.15	2.20705	6.4	1.50088	3.3	1.38031	4.6	1.84676	3.35	1.78517	4.8	1.28145	3.45	1.60509
Female_couple_040_h.jpg	Female Couple	40	h	7.05	1.2763	4.75	2.35919	6.25	1.37171	2.65	1.63111	5	1.62221	3.35	1.75544	5.55	1.35627	3.55	1.90498
Female_couple_041_h.jpg	Female Couple	41	h	6.5	1.63836	4.25	2.4252	5.4	1.60263	2.85	1.63111	4.35	1.92696	4.1	1.99737	5.85	1.78517	5.1	1.61897
Female_couple_042_h.jpg	Female Couple	42	h	6.8	1.79473	4.5	2.01311	5.55	1.46808	3.25	1.77334	5.45	1.79106	3.95	1.93241	4.45	1.46808	3.75	1.77334
Female_couple_043_h.jpg	Female Couple	43	h	7.05	1.39454	4.35	2.51888	6.35	1.13671	3.15	1.53125	5.5	1.4327	3.2	1.60918	5.25	1.25132	3.85	1.53125
Female_couple_044_h.jpg	Female Couple	44	h	5.55	1.5035	3.3	2.02874	5.65	1.13671	3.1	1.44732	4.85	2.15883	4.6	2.23371	4.55	1.90498	3.95	1.63755
Female_couple_045_h.jpg	Female Couple	45	h	6.8	1.36111	3.85	2.18307	6.4	1.60263	3.15	1.56525	5.25	2.0229	3.1	1.20961	5.5	1.60591	3.95	1.87715
Female_couple_046_h.jpg	Female Couple	46	h	6.4	1.53554	4.2	2.21478	6	1.37649	2.7	1.92217	5.45	1.98614	3.6	2.03651	5.5	1.63836	3.85	1.66307
Female_couple_047_v.jpg	Female Couple	47	v	6.05	1.70062	3.9	2.19809	5.65	1.34849	2.5	1.53897	5	1.86378	3.55	1.90498	6.1	1.55259	4.15	2.20705
Female_couple_048_h.jpg	Female Couple	48	h	6.55	1.66938	4.6	2.43656	6.2	1.67332	2.8	1.15166	4.7	1.97617	3.45	1.66938	4.45	0.887041	3.5	1.70139
Female_couple_049_h.jpg	Female Couple	49	h	6.95	0.998683	4.45	2.68475	6.15	1.34849	3.05	1.35627	4.9	2.24546	3.35	1.63111	5.55	1.23438	3.85	1.53125
Female_couple_050_h.jpg	Female Couple	50	h	7.35	1.46089	4.35	2.53969	6.5	1.35724	4.1	1.88903	5.25	1.916	3.95	2.01246	5	0.858395	3.1	1.55259
Male_001_v.jpg	Male	1	v	3.65	1.49649	3.45	2.48098	6.25	1.99671	4.85	2.30046	5.7	2.15455	4.55	1.98614	4.25	1.44641	3.7	2.02874
Male_002_v.jpg	Male	2	v	4.9	1.48324	2.15	1.1821	6.7	1.55935	4.35	2.32322	6	1.97351	4.65	1.98083	4	1.25656	2.85	1.63111
Male_003_v.jpg	Male	3	v	5.15	1.69442	2.45	1.35627	7.5	1.31789	5.25	2.31414	6.25	2.12442	5	2.02614	4.2	1.57614	3.65	2.1095
Male_004_v.jpg	Male	4	v	5	1.48678	2.9	1.94395	7.35	1.1821	5.5	2.18849	6.5	1.46898	4.35	2.15883	4.85	1.13671	3.2	1.88065
Male_005_v.jpg	Male	5	v	3.8	1.79473	3.25	2.22131	7.45	1.14593	6.5	1.67017	5.5	1.79179	4.4	2.0105	3.2	1.57614	4.75	2.24488
Male_006_v.jpg	Male	6	v	4.1	1.61897	2.65	1.63111	5.35	1.78517	4.2	2.1176	4.45	2.28208	4.85	2.15883	2.95	1.5035	4.8	2.39737
Male_007_h.jpg	Male	7	h	3.85	1.63111	2.7	2.00263	6.05	1.5035	3.8	1.76516	4.95	2.13923	4.1	1.80351	3.3	1.41793	4.05	2.35025
Male_008_v.jpg	Male	8	v	3.2	1.57614	3.9	2.77014	6.75	1.61815	5.3	2.17885	5.75	1.74341	4.7	2.12999	3.4	1.66702	4.45	2.5021
Male_009_v.jpg	Male	9	v	4.8	1.15166	2	1.1698	7.1	1.48324	4.4	2.08756	6.15	1.95408	4.85	2.0844	4.45	1.31689	2.85	1.7252
Male_010_v.jpg	Male	10	v	4.75	1.33278	2.1	1.11921	7.1	1.16529	4.45	1.93241	5.35	2.13431	3.8	2.23842	3.85	1.1821	3.75	2.22131
Male_011_v.jpg	Male	11	v	5.5	1.46898	2.9	2.02355	7	1.37649	5.2	2.46235	5.4	2.18608	4.5	2.21241	4.6	1.63514	3.15	1.46089
Male_012_h.jpg	Male	12	h	4.25	1.06992	2.2	1.43637	7.2	1.05631	5.3	2.10513	5.25	2.04875	3.75	2.0229	3.55	1.2763	2.95	1.76143
Male_013_v.jpg	Male	13	v	4.05	1.93241	2.7	1.92217	6.25	1.68195	4.35	2.1095	6.25	2.07428	5.3	1.8666	3.7	1.49032	3.75	1.65036
Male_014_v.jpg	Male	14	v	3.75	1.68195	2.65	2.1095	7.4	1.31389	6.3	1.8666	6.05	1.87715	5	1.94666	3.6	1.87504	3.95	2.66508
Male_015_v.jpg	Male	15	v	5	1.1698	2.35	1.42441	7.4	1.0463	4.9	1.94395	6.6	1.81804	4.1	2.19809	4.8	1.39925	2.7	1.80933
Male_016_v.jpg	Male	16	v	3.8	1.82382	3.05	2.35025	7.65	1.13671	6.4	2.18608	5.85	2.18307	5.45	2.1637	3.5	1.10024	3.6	2.0105
Male_017_v.jpg	Male	17	v	3.5	1.67017	3.3	1.94936	6.85	1.22582	5.15	2.00722	4.45	2.39462	4.7	1.75019	3.8	1.47256	4	1.74718
Male_018_v.jpg	Male	18	v	4.4	1.60263	2.55	1.66938	6.45	1.43178	4.15	2.32322	5.25	1.99671	3.9	2.31471	4.45	1.35627	3.2	1.93581
Male_019_h.jpg	Male	19	h	4.85	1.26803	2.15	1.8432	5.85	1.56525	3.85	2.20705	5.65	1.87153	3.75	2.33678	3.5	1.14708	3.1	1.74416
Male_020_v.jpg	Male	20	v	5.3	1.62546	2.75	1.916	7.85	0.933302	6.1	1.94395	6.25	1.77334	4.8	2.23842	3.95	1.46808	3.25	1.58529
Male_021_h.jpg	Male	21	h	4.25	1.11803	2.35	1.38697	6.85	1.30888	4.15	2.15883	5.4	2.0105	4.15	2.32322	3.75	1.25132	3.6	1.66702
Male_022_v.jpg	Male	22	v	3.55	1.95946	4	2.42791	6.8	2.04167	6.15	2.56032	4.35	2.60111	5.45	2.0641	3.1	2.12504	5.15	1.98083
Male_023_v.jpg	Male	23	v	5.25	1.01955	2.35	1.66307	7.5	1.10024	5.2	2.28496	6.6	2.0105	5.15	2.60111	5.05	1.39454	3	1.62221
Male_024_h.jpg	Male	24	h	5	1.29777	2.6	1.78885	7.4	0.940325	5.4	1.98415	6.6	1.63514	5.15	2.18307	4.5	1.35724	2.6	1.50088
Male_025_v.jpg	Male	25	v	4	1.55597	2.65	2.0844	5.9	1.55259	2.8	1.96281	4.5	2.11511	3.65	2.03328	3.45	1.19097	3.55	2.01246
Female_001_h.jpg	Female	1	h	6.6	1.42902	4.2	2.30788	4.8	1.10501	2.45	1.57196	5.4	1.31389	3.35	1.69442	6.9	1.20961	5.3	1.78001
Female_002_h.jpg	Female	2	h	7.5	1	5.8	2.60768	5.65	1.46089	3.05	2.01246	5.8	1.70448	4.45	1.8489	7.4	1.09545	5.85	2.00722
Female_003_v.jpg	Female	3	v	6.95	1.46808	5.2	2.33057	5.15	1.89945	3.15	1.95408	5.4	1.95744	4.85	2.1095	7	1.21395	5.1	2.02355
Female_004_v.jpg	Female	4	v	7.35	1.30888	5.45	2.2589	5.5	0.945905	2.75	1.55174	5.85	1.95408	3.6	1.90291	7.25	1.06992	5.8	2.04167
Female_005_v.jpg	Female	5	v	2.85	1.69442	3.55	2.54383	3.95	1.93241	4.7	2.20287	4.55	2.2589	4.65	2.34577	6.25	1.77334	5.6	2.16187
Female_006_v.jpg	Female	6	v	6.85	1.1821	4.35	1.87153	5.35	1.30888	2.35	1.56525	5.1	1.51831	3.25	2.14905	7.1	1.20961	5.7	1.62546
Female_007_v.jpg	Female	7	v	6.7	1.26074	4.25	2.29129	5.3	1.30182	2.2	1.32188	6.45	1.2763	3.8	2.35305	6.5	1.23544	4.75	2.4034
Female_008_v.jpg	Female	8	v	6.5	1.39548	4.3	2.36421	5.15	1.63111	2.85	2.0844	5.45	1.82021	3.75	2.12442	6.4	1.35336	4.7	2.07998
Female_009_h.jpg	Female	9	h	7	1.1698	5	2.49209	5.55	1.19097	3.1	2.31471	5.1	1.97084	4.7	2.25015	6.9	1.02084	5.55	1.93241
Female_010_h.jpg	Female	10	h	7.05	1.43178	5	2.57519	5.25	1.37171	2.55	1.5035	5.65	1.78517	4	1.97351	6.8	0.894427	4.9	2.12504
Female_011_h.jpg	Female	11	h	6.4	1.35336	3.85	2.0844	5.95	1.14593	2.3	1.55935	6.05	1.57196	3.45	1.76143	7.6	1.14248	5.85	2.1095
Female_012_v.jpg	Female	12	v	6.85	1.34849	4.85	2.68083	5.6	1.09545	2.7	1.68897	5.7	1.80933	4.15	2.15883	7.05	1.31689	5.15	2.0844
Female_013_h.jpg	Female	13	h	7.05	1.70062	5.5	2.39517	5	1.80642	3.35	2.53969	5.25	2.04875	4.5	2.28266	6.85	1.30888	5.5	2.09008
Female_014_v.jpg	Female	14	v	6.65	1.46089	4.5	2.48151	5.45	1.35627	2.5	1.46898	5.65	1.59852	3.95	1.98614	7.05	1.46808	5.3	1.94936
Female_015_v.jpg	Female	15	v	6.95	1.23438	4.65	2.51888	6.05	1.09904	2.85	1.22582	6.4	1.66702	4.05	1.87715	7.3	1.17429	5.55	2.23548
Female_016_h.jpg	Female	16	h	6.9	1.29371	5.25	2.29129	5.65	1.42441	2.95	2.03845	5.85	1.30888	3.5	1.76218	6.65	0.933302	4.5	1.67017
Female_017_v.jpg	Female	17	v	7.65	1.03999	6.1	2.17401	5.05	1.14593	2.5	1.63836	5.3	1.97617	4.7	2.02874	7.2	0.894427	5.75	2.07428
Female_018_h.jpg	Female	18	h	7.4	1.23117	5.5	2.1643	5.3	1.21828	2.85	1.46089	5.4	1.66702	4.1	2.07491	7.45	1.19097	6.5	1.9868
Female_019_h.jpg	Female	19	h	6.5	1.60591	4.6	2.68328	5.9	1.29371	3.6	2.30332	5.1	2.12504	4.15	2.0844	6.4	1.53554	5	2.22427
Female_020_v.jpg	Female	20	v	7.25	1.16416	5.25	1.61815	4.9	1.80351	3.25	2.4252	4.9	1.97084	4.2	1.57614	7.35	1.13671	6.2	2.04167
Female_021_h.jpg	Female	21	h	6.4	1.60263	5	2.31699	4.1	1.68273	3.85	2.30046	4.3	2.22663	4.45	1.79106	7.1	1.02084	6.3	2.36421
Female_022_h.jpg	Female	22	h	6.65	1.49649	5.9	2.02355	4.3	1.8666	4.75	2.59301	4.5	2.39517	5.5	2.21241	7.05	1.2763	6.1	2.26878
Female_023_h.jpg	Female	23	h	7.35	1.08942	5.3	2.20287	5.45	1.63755	2.8	1.82382	5.85	1.89945	4.55	1.93241	6.85	1.08942	5.4	1.98415
Female_024_v.jpg	Female	24	v	7.6	0.994723	6	2.05196	5.8	1.28145	2.8	1.96281	6.1	1.55259	3.95	1.76143	6.85	0.933302	5.4	1.72901
Female_025_h.jpg	Female	25	h	7.1	1.07115	4.55	2.32775	5.6	1.31389	2.25	1.25132	5.5	1.73205	3.65	1.69442	6.85	1.53125	5.35	2.32322
Faces_142_h.jpg	Non-erotic	142	h	2.9	1.65116	4.3	2.15455	3.55	1.57196	4.4	2.03651	3.45	1.57196	4	1.62221	4.05	1.09904	3.4	1.81804
Faces_146_h.jpg	Non-erotic	146	h	1.85	0.933302	5.25	2.67296	2.95	1.05006	4.5	2.09008	2.3	1.30182	5.15	2.39022	2.7	1.38031	5.3	2.31926
Faces_148_h.jpg	Non-erotic	148	h	2.5	1.39548	4.3	2.36421	2.8	1.43637	4.75	2.1734	2.05	1.19097	5.45	2.01246	3.9	1.55259	4.2	1.79473
Faces_154_h.jpg	Non-erotic	154	h	2.85	1.59852	4.2	2.62779	3.75	1.55174	4	2.17643	4.25	1.51744	3.6	1.63514	4.2	1.50787	3.05	1.70062
Faces_156_h.jpg	Non-erotic	156	h	3.4	2.11262	3.65	2.13431	3.5	2.01311	4.9	2.07491	3.4	2.13739	4.75	1.83174	4.55	2.2589	4.55	2.23548
Faces_158_h.jpg	Non-erotic	158	h	3	1.94666	4.25	2.57263	3.2	1.10501	4.95	1.8489	2.7	1.0311	4.4	2.21003	3.35	1.08942	4.05	2.1637
Faces_160_v.jpg	Non-erotic	160	v	4.3	1.78001	2.95	1.87715	4.5	1.31789	3.2	2.37531	3.8	1.28145	3.45	1.76143	4.8	1.05631	2.95	1.70062
Faces_165_v.jpg	Non-erotic	165	v	3.4	1.3917	3.3	2.15455	3.75	1.71295	3.35	2.00722	3.05	1.57196	4.75	2.29129	3.55	1.09904	3.65	1.87153
Faces_166_h.jpg	Non-erotic	166	h	3.4	1.3917	2.95	2.18789	4.05	1.09904	2.6	1.46539	4.25	1.51744	3.8	1.23969	4.05	1.60509	3.15	2.0844
Faces_171_v.jpg	Non-erotic	171	v	3.15	1.26803	3.45	2.03845	3.95	1.5035	3.45	1.87715	3.4	1.81804	4.25	1.88833	4.45	1.31689	3.6	2.11262
Faces_172_h.jpg	Non-erotic	172	h	1.65	1.13671	5.35	2.94288	1.85	1.1821	6.1	2.14966	1.3	0.571241	7.45	1.53811	2.35	1.13671	5.8	2.06729
Faces_181_v.jpg	Non-erotic	181	v	6.3	1.59275	3.9	2.40394	6.65	1.42441	3.5	1.82093	6.35	1.92696	4	1.80642	6.25	1.29269	3.6	2.13739
Faces_184_h.jpg	Non-erotic	184	h	5.9	1.16529	3.05	2.54383	5.4	0.820783	1.7	1.38031	5.8	1.28145	3.05	2.35025	5.6	0.88258	2.45	1.39454
Faces_195_v.jpg	Non-erotic	195	v	5.95	1.8489	4.1	2.57314	5.35	1.66307	3.75	2.19749	5.55	2.13923	4	1.86378	5.3	1.45458	3.9	2.02355
Faces_214_h.jpg	Non-erotic	214	h	5.75	2.14905	3.8	2.33057	5.5	1.5728	3.3	1.94936	6.05	1.82021	3.8	1.93581	5.7	1.65752	3.75	2.4252
Faces_224_h.jpg	Non-erotic	224	h	5.25	1.55174	2.6	1.90291	5.2	1.05631	1.95	1.14593	5.65	1.7252	3.35	2.0844	5.45	1.31689	3.05	2.01246
Faces_227_v.jpg	Non-erotic	227	v	5.55	0.944513	2.25	1.71295	6.2	1.39925	2.5	2.01311	6.3	1.30182	3.2	1.98945	6.05	1.5035	3.45	1.60509
Faces_234_h.jpg	Non-erotic	234	h	5.8	1.93581	3.05	2.32775	6.65	1.46089	3.75	2.1734	6.7	1.59275	4.6	2.16187	6.2	1.00525	4	1.89181
Faces_238_h.jpg	Non-erotic	238	h	6	1.83533	3.3	2.27342	6.4	1.50088	3.25	1.83174	6.65	1.42441	4.05	2.48098	6.7	1.34164	3.75	2.24488
Faces_249_v.jpg	Non-erotic	249	v	6.7	1.59275	3.15	1.7252	5.9	1.20961	3.15	1.81442	6.3	1.68897	3.15	2.23077	6.6	1.53554	3.3	2.12999
Faces_253_v.jpg	Non-erotic	253	v	5.25	1.61815	2.05	1.43178	5.7	1.38031	2.55	1.14593	5.9	1.29371	3.45	1.76143	5.1	1.29371	3.05	1.57196
Faces_269_v.jpg	Non-erotic	269	v	2.95	1.5035	3.8	2.33057	3.6	1.6983	3.65	2.20705	3.55	1.98614	4.35	2.25424	4.9	1.25237	3.35	1.63111
Faces_271_h.jpg	Non-erotic	271	h	2.65	1.81442	3.8	2.8764	3	1.21395	5.1	2.31471	2.8	1.90843	5.65	2.41214	3.4	1.31389	4.65	2.20705
Faces_277_h.jpg	Non-erotic	277	h	3.55	2.0641	3.8	2.19089	4.25	1.48235	4.4	1.87504	3.5	1.9868	4.2	2.48363	5.35	1.75544	4.1	1.94395
Faces_284_h.jpg	Non-erotic	284	h	1.75	0.850696	5.6	2.70283	1.8	0.894427	6.05	1.98614	1.85	1.08942	6.45	2.21181	2.95	1.5035	4.9	1.44732
Faces_287_h.jpg	Non-erotic	287	h	2.7	1.52523	3.85	2.56032	3	1.1698	4.65	2.1095	3.6	2.0105	4.8	2.21478	4.1	2.44734	5.15	2.3681
Faces_290_h.jpg	Non-erotic	290	h	2.2	1.32188	4.7	2.59757	2.7	1.08094	5.55	2.28208	1.75	0.850696	6	2.02614	3	1.33771	4.85	1.87153
Faces_291_h.jpg	Non-erotic	291	h	2.35	1.08942	4.45	2.30503	3.45	2.03845	5.15	2.13431	2.35	1.81442	5.05	2.23548	3.15	1.13671	5	2.07745
Faces_292_h.jpg	Non-erotic	292	h	4.55	1.66938	2.65	1.69442	5.15	1.42441	3.25	1.88833	5.05	1.8489	4.2	2.01573	4.9	1.33377	3.5	1.67017
Faces_294_h.jpg	Non-erotic	294	h	2.2	1.00525	4.4	2.23371	2.5	1	4.2	2.04167	2.8	1.32188	4.65	2.3681	2.95	1.14593	4.85	1.66307
Faces_295_h.jpg	Non-erotic	295	h	4.9	1.97084	3.1	2.17401	4.25	1.68195	3.45	2.1637	5	2.20048	3.85	2.03328	6.3	1.92217	4.05	2.1637
Faces_298_h.jpg	Non-erotic	298	h	2.15	1.46089	4.55	2.1637	2.75	1.40955	5.05	1.82021	3.1	2.24546	5.1	2.31471	4.4	1.95744	4.2	2.30788
Faces_302_h.jpg	Non-erotic	302	h	2.2	1.32188	4.55	2.70429	2.75	1.16416	4.4	2.18608	2.55	2.0641	5.85	2.00722	3.15	1.34849	5.05	2.01246
Faces_303_h.jpg	Non-erotic	303	h	2.75	1.51744	3.75	2.29129	2.85	1.22582	4.35	2.03328	2.4	1.09545	5.15	2.13431	2.7	1.21828	4.6	2.11262
Faces_308_h.jpg	Non-erotic	308	h	5.6	1.0463	2.1	1.20961	6.2	1.23969	2.95	1.35627	5.85	1.78517	3.6	2.13739	5.15	1.22582	2.95	1.73129
Faces_314_h.jpg	Non-erotic	314	h	4.85	1.66307	2.55	2.01246	5.7	1.0311	2	1.29777	5.75	1.65036	2.9	2.12504	5.25	1.25132	3.3	1.8666
Faces_316_h.jpg	Non-erotic	316	h	5.4	1.56945	2.55	2.11449	6.4	1.27321	3.1	2.04939	6.55	1.35627	3.4	1.93037	5.85	1.30888	3.05	2.13923
Faces_322_v.jpg	Non-erotic	322	v	6.55	1.73129	3.5	2.03909	6.9	1.55259	3.95	2.08945	6.15	1.78517	3.9	1.99737	6.5	1	4.25	1.97017
Faces_328_v.jpg	Non-erotic	328	v	5.45	1.66938	2.7	2.02874	5.8	1.00525	2.3	1.12858	5.5	1.9868	3.35	1.98083	4.85	1.59852	2.7	1.41793
Faces_330_v.jpg	Non-erotic	330	v	7	1.89181	4.15	2.32322	6.45	1.66938	4.4	2.08756	6.9	1.80351	4.25	2.35919	6.35	1.66307	4.45	2.13923
Faces_331_h.jpg	Non-erotic	331	h	5.35	1.34849	2.45	1.82021	6.8	1.00525	4.05	1.90498	6.4	1.31389	3.85	2.41214	5.4	1.14248	2.55	1.57196
Faces_333_h.jpg	Non-erotic	333	h	6.8	1.32188	3.25	2.04875	6.7	1.41793	3.25	1.74341	6.55	1.60509	3.7	2.12999	5.85	1.69442	3.3	1.75019
Faces_335_h.jpg	Non-erotic	335	h	5.1	1.16529	2.35	1.8432	5.65	0.875094	1.9	1.58612	6.8	1.47256	3.35	2.3681	5.55	1.2763	2.5	1.53897
Faces_345_h.jpg	Non-erotic	345	h	6.35	1.46089	2.8	1.88065	6.25	1.33278	2.55	1.70062	6.8	1.64157	4.3	2.36421	6	1.29777	3.25	1.55174
Faces_349_h.jpg	Non-erotic	349	h	6.05	1.2763	2.55	1.82021	6.35	1.22582	2.95	1.60509	6.7	1.0311	3.45	1.8489	5.65	0.988087	2.75	1.71295
Faces_351_h.jpg	Non-erotic	351	h	7.5	1.23544	4.6	2.72223	7.35	1.13671	4.55	1.70062	7.05	1.60509	4.65	2.34577	7.1	1.20961	4.5	2.06474
Faces_352_h.jpg	Non-erotic	352	h	6.05	2.11449	3.4	2.08756	6.4	1.3917	3.65	2.03328	7	1.62221	4.8	2.14231	6.7	1.45458	4.15	1.8432
Faces_356_h.jpg	Non-erotic	356	h	6.5	2.3056	3.35	1.89945	6.35	1.59852	3.85	1.87153	7.15	1.56525	4.1	2.40394	6.9	1.61897	3.95	1.8489
Faces_362_v.jpg	Non-erotic	362	v	1.75	1.16416	4.95	2.76205	2.5	1	5.65	2.00722	1.8	0.894427	6.8	1.79473	2.85	1.78517	5.85	2.059
Faces_370_h.jpg	Non-erotic	370	h	2.6	1.50088	4.45	3.08605	2.7	1.0311	4.45	1.82021	3.2	2.23842	4.8	2.94868	3.7	1.68897	4.55	2.43818
People_001_h.jpg	Non-erotic	1	h	1.7	1.0311	5.45	2.52305	2.2	1.15166	5.6	2.16187	2.15	1.1821	6.2	2.23842	2.3	1.41793	5.4	2.21003
People_003_h.jpg	Non-erotic	3	h	1.9	1.20961	6	2.8654	1.95	0.825578	6.15	2.23077	1.85	1.13671	6.6	2.13739	2.35	1.42441	5.85	2.60111
People_007_h.jpg	Non-erotic	7	h	2.2	1.32188	3.45	2.58488	2.65	1.26803	4.55	1.8489	2.75	1.61815	5.5	2.09008	2.75	1.20852	5.2	1.93581
People_011_h.jpg	Non-erotic	11	h	2.7	1.45458	4.25	2.4468	3.75	1.40955	3.75	1.94327	3.8	2.28496	4.95	2.81864	3.85	1.87153	5.1	2.24546
People_018_h.jpg	Non-erotic	18	h	3.35	1.56525	2.95	2.03845	3.7	1.30182	3.25	1.65036	4	1.21395	4.6	1.90291	4.8	1.90843	4.2	2.16673
People_027_h.jpg	Non-erotic	27	h	5.2	1.47256	2.2	1.23969	5.25	1.11803	2.35	1.87153	5.65	1.53125	3.7	2.05452	5.5	1.4327	2.85	1.66307
People_038_h.jpg	Non-erotic	38	h	1.25	0.910465	6.75	2.7506	1.2	0.523148	7.9	1.61897	1.15	0.48936	8.1	1.68273	1.85	1.30888	6.9	1.91669
People_056_h.jpg	Non-erotic	56	h	4.85	1.08942	1.65	1.03999	5.35	0.812728	1.6	0.940325	5.6	1.14248	2.5	1.63836	5.15	0.587143	2.15	1.49649
People_070_v.jpg	Non-erotic	70	v	2.05	1.35627	4.8	2.83957	2.85	1.7252	5.35	2.43386	2.45	1.31689	5.85	2.25424	3.6	1.87504	4.8	2.66754
People_071_h.jpg	Non-erotic	71	h	2.65	1.34849	3.7	2.69698	3.4	1.42902	3.75	2.1734	2.5	0.945905	4.5	2.03909	4.2	1.47256	3.3	1.49032
People_074_v.jpg	Non-erotic	74	v	3.65	2.03328	3.9	2.42574	3.75	1.65036	4.15	2.27746	3.3	1.45458	4.5	2.43872	4.7	1.55935	4	1.97351
People_086_h.jpg	Non-erotic	86	h	2.75	1.68195	3.85	2.34577	3	1.37649	4.5	1.9868	2.35	1.63111	5.35	2.60111	3.95	1.95946	4.95	1.8489
People_094_h.jpg	Non-erotic	94	h	3.05	2.11449	4	2.61574	3.25	1.51744	4.3	2.25015	3.2	2.41922	4.35	2.45539	3	1.71679	4.9	2.38195
People_116_h.jpg	Non-erotic	116	h	6.55	1.23438	3.3	2.25015	7	1.52177	3.45	1.82021	7.6	1.50088	5.15	2.66112	6.55	1.43178	3.95	1.95946
People_127_h.jpg	Non-erotic	127	h	1.45	0.998683	6.2	2.52566	1.7	0.801315	6.5	1.70139	1.5	0.688247	6.6	2.39297	2.25	1.55174	6.1	1.71372
People_128_h.jpg	Non-erotic	128	h	1.5	0.945905	6.05	2.64525	2.05	1.35627	6.7	1.8666	2.05	1.23438	6.55	2.13923	2	1.1698	6.55	1.76143
People_131_h.jpg	Non-erotic	131	h	3.25	2.12442	4.1	2.10013	5.05	2.23548	4	2.05196	4	1.77705	4.75	2.2682	4.25	1.74341	4.4	2.03651
People_132_h.jpg	Non-erotic	132	h	4.25	1.86025	2.65	1.98083	5	0.973329	2.05	1.35627	4.5	1.67017	2.85	1.7252	4.9	1.48324	3.5	1.79179
People_134_h.jpg	Non-erotic	134	h	2.85	0.988087	3.5	2.09008	3.7	0.656947	3.35	1.81442	3.45	1.79106	3.95	2.28208	3.5	1.73205	4.85	2.18307
People_135_h.jpg	Non-erotic	135	h	3.55	1.57196	3.25	2.3814	3.55	1.19097	3.5	2.25948	4.05	1.63755	3.7	1.89459	3.7	1.26074	3.2	1.93581
People_136_h.jpg	Non-erotic	136	h	2.1	1.11921	4.35	2.60111	3.05	1.2763	4	2.36198	2.65	1.46089	4.7	2.38636	3.3	1.45458	4.75	1.916
People_137_h.jpg	Non-erotic	137	h	3.5	1.79179	3.1	2.17401	3.8	0.951453	3.1	1.68273	3.4	1.84676	4.25	1.83174	4.45	1.39454	3.45	2.01246
People_138_h.jpg	Non-erotic	138	h	5	2.02614	3.45	2.4165	4.8	1.23969	3.15	1.8432	5.4	1.93037	4.4	2.11262	5.7	1.30182	3.65	2.03328
People_140_h.jpg	Non-erotic	140	h	1.5	0.945905	5.45	2.99956	1.75	0.850696	6	2.31699	1.8	0.833509	6.35	1.78517	2.3	1.34164	6.25	2.0995
People_146_h.jpg	Non-erotic	146	h	4.6	1.31389	1.9	1.37267	4.6	0.88258	1.65	0.812728	5.2	1.28145	3	1.97351	4.65	0.74516	2.35	1.42441
People_149_h.jpg	Non-erotic	149	h	4.3	1.62546	3.45	2.01246	5.6	1.09545	2.35	1.59852	4.95	1.70062	3.7	1.94936	4.9	1.07115	3	1.62221
People_153_h.jpg	Non-erotic	153	h	5.9	1.91669	3.5	2.3056	6.15	1.13671	2.45	1.70062	6.75	2.04875	3.8	2.14231	6	1.1698	3.5	1.93309
People_154_h.jpg	Non-erotic	154	h	6.45	1.53811	3.1	2.26878	6.65	1.49649	3.45	2.43818	6.8	1.50787	3.85	2.39022	5.95	1.53811	3.7	1.83819
People_157_h.jpg	Non-erotic	157	h	5.35	2.34577	2.9	1.74416	5.05	1.19097	2.65	1.8432	5.35	1.75544	3.15	1.49649	5.25	1.58529	3.05	1.76143
People_158_h.jpg	Non-erotic	158	h	5.25	1.86025	3.25	2.12442	5.1	1.29371	2.65	1.69442	5.6	1.56945	3.05	2.0641	4.95	1.57196	3.75	1.94327
People_163_v.jpg	Non-erotic	163	v	5.45	2.23548	3.2	2.23842	5.85	1.13671	2.85	1.42441	6.75	1.88833	3.95	2.18789	5.8	1.15166	2.85	1.59852
People_169_h.jpg	Non-erotic	169	h	7.05	1.70062	3.7	2.34184	6.7	1.62546	3.75	2.04875	7.85	1.53125	5.4	2.39297	6.6	1.23117	4.15	2.00722
People_172_v.jpg	Non-erotic	172	v	6.7	2.02874	3.65	2.66112	7.6	1.50088	5.7	2.43007	7.7	1.49032	5.15	2.03328	7.15	1.38697	4.35	1.81442
People_175_h.jpg	Non-erotic	175	h	5.95	1.53811	2.7	1.83819	6.15	1.22582	2.5	1.10024	6.3	1.75019	4.15	2.20705	5.8	1.36111	3.4	1.93037
People_176_h.jpg	Non-erotic	176	h	7	1.48678	4.45	2.48098	7	1.45095	3.85	2.23077	7.45	1.53811	4.7	2.53606	7.1	1.20961	4.4	2.25715
People_178_h.jpg	Non-erotic	178	h	6.05	1.76143	2.9	2.10013	6.2	1.15166	2.45	1.23438	7.05	1.09904	3.85	1.98083	6.1	1.11921	3.75	1.71295
People_179_h.jpg	Non-erotic	179	h	5.9	1.20961	2.55	1.93241	5.95	1.31689	2.75	1.68195	7.3	1.49032	3.95	2.1637	6.25	1.20852	3.65	1.87153
People_185_h.jpg	Non-erotic	185	h	6.6	1.75919	3.15	1.8432	7	1.1239	4.15	2.23077	7.65	1.34849	4.9	2.29186	6.1	1.37267	3.35	1.75544
People_187_h.jpg	Non-erotic	187	h	7.25	1.55174	4	2.44949	6.9	1.07115	4.4	2.32605	7.35	1.53125	4.75	2.48945	6.9	1.16529	4.55	2.0641
People_190_h.jpg	Non-erotic	190	h	7.5	1.14708	3.75	2.3814	7.2	1.32188	4.4	2.60364	7.65	1.38697	5.05	2.21181	7.6	0.940325	5	2.05196
People_194_h.jpg	Non-erotic	194	h	6.2	1.57614	3.25	1.86025	6.8	1.23969	4.15	2.1095	5.9	1.80351	3.7	2.10513	5.45	1.23438	3	1.68585
People_199_v.jpg	Non-erotic	199	v	2.1	1.61897	5.95	3.03445	2.5	1.5728	6.15	2.3681	2.35	1.81442	7.4	2.21003	3	2.02614	5.8	2.35305
People_201_v.jpg	Non-erotic	201	v	1.3	1.12858	6.4	2.87274	1.85	1.22582	6.5	2.13985	1.5	0.688247	6.7	2.29645	2.2	1.64157	5.95	1.93241
People_205_v.jpg	Non-erotic	205	v	1.45	1.09904	6.35	3.0483	1.8	1.10501	6.9	2.26878	1.85	1.1821	6.8	1.93581	2.45	1.43178	5.9	2.17401
People_210_h.jpg	Non-erotic	210	h	2.85	1.26803	2.8	1.98945	3.35	0.988087	3.45	2.0641	3.35	1.63111	3.6	1.93037	3.4	1.56945	4.3	1.97617
People_214_h.jpg	Non-erotic	214	h	3.35	2.30046	4	2.53398	4	1.58944	4.6	2.70283	2.9	2.02355	5.05	2.70429	4.25	2.07428	4.55	2.5021
People_225_h.jpg	Non-erotic	225	h	1.8	1.36111	5.25	2.63329	2.8	1.79473	4.6	2.06219	2.05	1.31689	6.45	2.45967	2.5	1.46898	5.25	2.31414
People_236_v.jpg	Non-erotic	236	v	3.35	1.89945	4.3	2.63778	3.9	1.16529	4.05	2.21181	3.85	2.00722	4.3	2.51522	4.25	1.88833	4.3	2.07998
People_244_v.jpg	Non-erotic	244	v	2.4	1.46539	4.6	2.56289	2.8	1.28145	4.6	2.03651	3	1.80642	5.2	2.37531	3.35	1.66307	5	2.33959
People_246_h.jpg	Non-erotic	246	h	1.5	0.945905	5.75	2.69258	1.8	0.695852	6.4	1.72901	1.3	0.571241	7.7	1.55935	2.45	1.57196	5.2	2.01573

## Sheet: Image parameters
ID	Category	Width	Height	Luminance	Contrast	JPEG_size80	LABL	LABA	LABB	Entropy
Opposite-sex_couple_001_v.jpg	Opposite-sex Couple	1200	1600	123.7252	69.5985	189291	50.9569	4.8773	15.3441	7.8416
Opposite-sex_couple_002_h.jpg	Opposite-sex Couple	1600	1200	147.5143	82.3112	244927	60.763	8.5758	13.1763	7.7336
Opposite-sex_couple_003_v.jpg	Opposite-sex Couple	1200	1600	110.7328	42.0439	309596	46.5458	6.9134	10.1109	7.3752
Opposite-sex_couple_004_v.jpg	Opposite-sex Couple	1200	1600	90.8357	71.4747	235417	37.953	6.7862	13.4306	7.5217
Opposite-sex_couple_005_h.jpg	Opposite-sex Couple	1600	1200	177.1434	63.0692	129078	71.3527	0.0823	2.7104	6.9023
Opposite-sex_couple_006_h.jpg	Opposite-sex Couple	1600	1200	118.5461	67.315	287836	48.8917	6.1181	11.1487	7.8156
Opposite-sex_couple_007_h.jpg	Opposite-sex Couple	1600	1200	47.7613	57.3072	275394	22.6458	12.4804	7.915	6.5328
Opposite-sex_couple_008_h.jpg	Opposite-sex Couple	1600	1200	39.3571	51.7477	119546	16.5249	6.2003	7.9397	4.6123
Opposite-sex_couple_009_h.jpg	Opposite-sex Couple	1600	1200	93.6479	80.8616	186883	37.7181	1.8245	3.7651	7.5798
Opposite-sex_couple_010_h.jpg	Opposite-sex Couple	1600	1200	193.2464	55.9557	180024	77.781	5.3786	5.4128	6.2621
Opposite-sex_couple_011_h.jpg	Opposite-sex Couple	1600	1200	128.7855	78.465	283429	52.5903	6.8592	8.7999	7.7598
Opposite-sex_couple_012_h.jpg	Opposite-sex Couple	1600	1200	119.7231	48.3001	174501	51.0648	18.6779	27.0762	7.4745
Opposite-sex_couple_013_h.jpg	Opposite-sex Couple	1600	1200	120.1783	55.1144	265017	49.891	3.8167	7.5893	7.6887
Opposite-sex_couple_014_h.jpg	Opposite-sex Couple	1600	1200	70.3939	55.9046	170198	31.1618	19.8601	20.9606	7.1043
Opposite-sex_couple_015_h.jpg	Opposite-sex Couple	1600	1200	92.9302	75.1764	164951	38.3611	6.0222	7.7653	7.5486
Opposite-sex_couple_016_v.jpg	Opposite-sex Couple	1200	1600	58.3468	34.2728	193991	25.8676	15.3644	22.8825	6.9387
Opposite-sex_couple_017_v.jpg	Opposite-sex Couple	1200	1600	56.3153	43.2164	199604	23.5619	6.3891	5.0569	6.988
Opposite-sex_couple_018_h.jpg	Opposite-sex Couple	1600	1200	48.4754	20.2962	160728	22.2668	19.7776	23.7659	6.2371
Opposite-sex_couple_019_v.jpg	Opposite-sex Couple	1200	1600	82.5098	61.2729	226298	34.0967	1.7536	6.91	7.585
Opposite-sex_couple_020_h.jpg	Opposite-sex Couple	1600	1200	134.8088	59.7471	248017	55.3482	-1.1208	-1.4586	7.2655
Opposite-sex_couple_021_h.jpg	Opposite-sex Couple	1600	1200	106.8036	58.7489	210690	44.6078	6.0722	7.2272	7.7072
Opposite-sex_couple_022_v.jpg	Opposite-sex Couple	1200	1600	112.0946	64.2866	253664	46.9156	5.0465	30.4134	7.61
Opposite-sex_couple_023_h.jpg	Opposite-sex Couple	1600	1200	77.8579	72.0881	190248	31.8043	3.3207	4.7035	7.0663
Opposite-sex_couple_024_h.jpg	Opposite-sex Couple	1600	1200	156.5165	64.8712	222144	63.8212	5.895	13.5005	7.414
Opposite-sex_couple_025_h.jpg	Opposite-sex Couple	1600	1200	100.8693	49.8527	232724	43.3354	16.8426	26.7224	7.4546
Opposite-sex_couple_026_h.jpg	Opposite-sex Couple	1600	1200	104.1258	83.4035	216658	42.1058	2.3791	-0.1064	7.6998
Opposite-sex_couple_027_h.jpg	Opposite-sex Couple	1600	1200	136.1679	59.2256	327184	56.0298	-0.0713	13.2166	7.7997
Opposite-sex_couple_028_h.jpg	Opposite-sex Couple	1600	1200	64.2424	44.9292	236900	27.5664	16.0431	13.151	7.1122
Opposite-sex_couple_029_h.jpg	Opposite-sex Couple	1600	1200	96.4523	71.0295	234204	40.4753	12.3775	16.3586	7.5966
Opposite-sex_couple_030_v.jpg	Opposite-sex Couple	1200	1600	118.2077	57.4348	247261	49.2454	9.1719	15.254	7.6377
Opposite-sex_couple_031_h.jpg	Opposite-sex Couple	1600	1200	106.8513	74.8126	192294	43.6293	5.2021	4.4399	7.6138
Opposite-sex_couple_032_h.jpg	Opposite-sex Couple	1600	1200	100.0589	62.9703	215284	41.2815	6.2757	6.34	7.6613
Opposite-sex_couple_033_v.jpg	Opposite-sex Couple	1200	1600	71.8415	67.3131	240015	30.0265	8.9049	4.1706	6.6794
Opposite-sex_couple_034_h.jpg	Opposite-sex Couple	1600	1200	112.7509	66.354	216097	46.4443	6.2126	3.1862	7.6067
Opposite-sex_couple_035_h.jpg	Opposite-sex Couple	1600	1200	85.8631	62.0043	417587	35.914	5.8165	15.5562	7.6422
Opposite-sex_couple_036_h.jpg	Opposite-sex Couple	1600	1200	129.9555	78.2123	182716	52.8624	5.0927	11.9645	7.8995
Opposite-sex_couple_037_h.jpg	Opposite-sex Couple	1600	1200	120.444	81.4695	243159	49.3313	5.515	5.3549	7.8999
Opposite-sex_couple_038_h.jpg	Opposite-sex Couple	1600	1200	64.2584	46.3629	299669	27.3219	8.5338	17.6616	7.2425
Opposite-sex_couple_039_h.jpg	Opposite-sex Couple	1600	1200	149.5875	90.0014	188568	60.0482	3.1167	6.6707	7.4893
Opposite-sex_couple_040_v.jpg	Opposite-sex Couple	1200	1600	89.2827	41.4403	217952	38.4489	12.7145	22.3042	7.2266
Opposite-sex_couple_041_v.jpg	Opposite-sex Couple	1200	1600	182.158	67.5089	194353	73.3277	5.0851	3.9298	7.1388
Opposite-sex_couple_042_h.jpg	Opposite-sex Couple	1600	1200	110.4947	40.9533	179529	49.6856	29.7156	31.0599	7.2635
Opposite-sex_couple_043_v.jpg	Opposite-sex Couple	1200	1600	64.5956	56.8662	192603	26.4844	-0.7547	1.6832	7.3033
Opposite-sex_couple_044_h.jpg	Opposite-sex Couple	1600	1200	60.1181	60.6129	163218	24.3697	0.81	3.0644	7.1416
Opposite-sex_couple_045_h.jpg	Opposite-sex Couple	1600	1200	81.6406	70.0665	238575	33.5292	5.541	1.9065	7.4979
Opposite-sex_couple_046_h.jpg	Opposite-sex Couple	1600	1200	76.4988	67.6762	196760	31.9443	10.2302	12.4698	7.3074
Opposite-sex_couple_047_v.jpg	Opposite-sex Couple	1200	1600	110.7088	63.8914	248159	45.5275	4.3116	8.5673	7.6091
Opposite-sex_couple_048_h.jpg	Opposite-sex Couple	1600	1200	39.7062	42.5091	135965	17.0385	6.2044	9.7063	6.3582
Opposite-sex_couple_049_h.jpg	Opposite-sex Couple	1600	1200	86.3393	53.7518	271781	35.8483	0.9363	2.0085	7.613
Opposite-sex_couple_050_h.jpg	Opposite-sex Couple	1600	1200	41.9043	29.0086	144745	17.485	5.8187	11.3853	6.1198
Male_couple_001_v.jpg	Male Couple	1200	1600	134.2271	75.4355	362960	54.7692	6.4704	9.5249	7.7336
Male_couple_002_h.jpg	Male Couple	1600	1200	89.4837	38.3564	205911	37.4875	-0.2515	6.5637	7.179
Male_couple_003_v.jpg	Male Couple	1200	1600	163.458	52.8548	171950	66.5166	2.7684	-4.2231	7.4467
Male_couple_004_v.jpg	Male Couple	1200	1600	130.7779	72.8965	261868	53.81	3.9784	7.5108	7.8288
Male_couple_005_h.jpg	Male Couple	1600	1200	129.5121	56.2727	216115	54.1021	5.4602	5.0591	7.3188
Male_couple_006_h.jpg	Male Couple	1600	1200	143.2681	64.1905	343161	58.501	3.4827	6.3648	7.5899
Male_couple_007_v.jpg	Male Couple	1200	1600	163.6007	34.7375	179516	67.2865	-0.1492	-1.6924	6.7861
Male_couple_008_h.jpg	Male Couple	1600	1200	137.3406	53.6679	426254	56.7442	7.9832	3.7507	7.4524
Male_couple_009_v.jpg	Male Couple	1200	1600	109.8661	55.2816	260182	46.9517	17.3454	23.3053	7.6829
Male_couple_010_h.jpg	Male Couple	1600	1200	129.8574	55.7967	265521	53.8929	6.0205	3.7748	7.6787
Male_couple_011_v.jpg	Male Couple	1200	1600	64.3249	80.2244	166041	26.2942	6.009	10.2511	6.72
Male_couple_012_v.jpg	Male Couple	1200	1600	122.2359	55.8982	356017	51.6895	10.2702	12.2373	7.7737
Male_couple_013_h.jpg	Male Couple	1600	1200	134.1154	73.0222	231525	55.2798	-2.2027	4.6598	7.4902
Male_couple_014_h.jpg	Male Couple	1600	1200	106.9491	74.69	288191	44.8562	-0.1825	1.145	7.445
Male_couple_015_v.jpg	Male Couple	1200	1600	103.9613	48.3338	111341	46.9837	22.1316	53.6395	7.3437
Male_couple_016_h.jpg	Male Couple	1600	1200	104.9909	61.8847	199792	43.5508	6.7025	9.6391	7.7563
Male_couple_017_h.jpg	Male Couple	1600	1200	195.5832	84.7796	155591	77.6514	2.4172	5.683	4.9229
Male_couple_018_h.jpg	Male Couple	1600	1200	98.8075	39.8044	528281	41.753	-9.6718	19.8907	7.2262
Male_couple_019_h.jpg	Male Couple	1600	1200	115.2446	73.8637	211380	47.8506	8.9456	4.4504	7.513
Male_couple_020_h.jpg	Male Couple	1600	1200	102.4761	61.1341	233335	42.6955	10.24	4.9908	7.5227
Male_couple_021_h.jpg	Male Couple	1600	1200	108.2571	51.09	196656	44.8661	1.8777	-6.5466	7.5663
Male_couple_022_v.jpg	Male Couple	1200	1600	60.727	34.2341	140757	26.7492	-8.3328	-6.3093	6.8234
Male_couple_023_v.jpg	Male Couple	1200	1600	46.7429	46.5517	283516	20.6063	14.5116	11.3962	6.4646
Male_couple_024_h.jpg	Male Couple	1600	1200	100.8684	66.8073	247201	41.6405	2.9857	6.8673	7.6836
Male_couple_025_v.jpg	Male Couple	1200	1600	64.9355	55.1917	142199	27.8636	12.7703	19.4808	7.2299
Male_couple_026_v.jpg	Male Couple	1200	1600	154.0392	75.1603	179606	62.2496	3.9922	2.7034	7.5681
Male_couple_027_h.jpg	Male Couple	1600	1200	67.0478	51.0755	202050	28.6718	8.6595	13.8789	7.2533
Male_couple_028_h.jpg	Male Couple	1600	1200	113.0165	89.7602	189137	45.7309	1.0343	2.2339	7.6573
Male_couple_029_h.jpg	Male Couple	1600	1200	46.8055	68.3009	184235	19.0595	5.7954	6.5674	5.8536
Male_couple_030_v.jpg	Male Couple	1200	1600	117.9663	73.8539	249671	48.5226	9.1431	10.0408	7.9008
Male_couple_031_h.jpg	Male Couple	1600	1200	119.9762	68.3101	301565	49.397	2.4734	-0.0895	7.7507
Male_couple_032_h.jpg	Male Couple	1600	1200	110.0264	68.578	213034	45.3563	1.6695	12.8467	7.8563
Male_couple_033_v.jpg	Male Couple	1200	1600	120.5496	61.1756	157560	51.1408	16.5554	25.2587	7.8507
Male_couple_034_h.jpg	Male Couple	1600	1200	108.3473	71.6545	372628	44.6666	6.1691	12.4782	7.6834
Male_couple_035_h.jpg	Male Couple	1600	1200	98.1699	93.2863	271081	40.5279	7.5966	-2.5397	7.2567
Male_couple_036_h.jpg	Male Couple	1600	1200	103.2978	75.3183	226361	42.5287	8.0538	9.1629	7.7279
Male_couple_037_v.jpg	Male Couple	1200	1600	105.7932	76.1542	265975	43.2802	5.2379	2.6962	7.6745
Male_couple_038_v.jpg	Male Couple	1200	1600	82.8237	70.7913	222108	34.7736	12.1449	8.9175	7.4163
Male_couple_039_h.jpg	Male Couple	1600	1200	60.7345	61.5929	200030	24.6102	2.4884	-4.2947	7.1514
Male_couple_040_h.jpg	Male Couple	1600	1200	80.6663	67.9049	185929	32.9772	4.0066	2.4201	7.4437
Male_couple_041_h.jpg	Male Couple	1600	1200	112.3857	56.8522	219711	47.0858	8.724	7.9499	7.6952
Male_couple_042_h.jpg	Male Couple	1600	1200	85.3736	60.6672	230126	35.2394	3.9279	1.7698	7.6065
Male_couple_043_v.jpg	Male Couple	1200	1600	69.0086	66.5699	215920	28.338	5.2807	-3.4996	7.1344
Male_couple_044_h.jpg	Male Couple	1600	1200	50.8484	49.1775	158041	20.6794	4.4175	2.1516	6.941
Male_couple_045_h.jpg	Male Couple	1600	1200	109.7315	56.9328	253081	45.8308	7.1553	0.8294	7.6844
Male_couple_046_h.jpg	Male Couple	1600	1200	44.3044	46.1813	161688	17.7815	2.6226	-0.1315	6.596
Male_couple_047_h.jpg	Male Couple	1600	1200	93.8279	67.1104	186038	38.6953	6.7433	8.1226	7.619
Male_couple_048_h.jpg	Male Couple	1600	1200	134.7649	64.0303	180125	55.7021	8.4057	17.2628	7.6868
Male_couple_049_h.jpg	Male Couple	1600	1200	88.8693	81.3885	154934	36.4238	0.8832	0.6697	6.1292
Male_couple_050_h.jpg	Male Couple	1600	1200	86.0489	61.0119	306076	37.5512	11.0056	17.691	7.5958
Female_couple_001_h.jpg	Female Couple	1600	1200	109.8475	67.2034	277944	46.7683	14.1759	9.342	7.8667
Female_couple_002_v.jpg	Female Couple	1200	1600	146.0327	75.185	160622	59.204	2.4982	7.1034	7.6205
Female_couple_003_h.jpg	Female Couple	1600	1200	99.3429	67.7808	314154	40.8859	6.1159	4.937	7.7539
Female_couple_004_h.jpg	Female Couple	1600	1200	104.027	57.3645	202242	44.7724	19.4888	25.9997	7.6502
Female_couple_005_v.jpg	Female Couple	1200	1600	138.8766	66.1014	179040	57.0347	10.0957	15.6947	7.3232
Female_couple_006_v.jpg	Female Couple	1200	1600	116.4633	63.1439	240522	47.8948	4.6198	-4.3426	7.7805
Female_couple_007_v.jpg	Female Couple	1200	1600	99.9284	54.3831	193112	42.9596	14.3382	31.42	7.4251
Female_couple_008_v.jpg	Female Couple	1200	1600	186.7866	60.5182	182179	75.3289	2.4955	12.0605	7.2475
Female_couple_009_v.jpg	Female Couple	1200	1600	174.4187	66.3908	206233	70.9899	10.8028	13.6005	7.6796
Female_couple_010_h.jpg	Female Couple	1600	1200	131.7351	78.2654	323501	53.9012	4.4331	12.9353	7.5833
Female_couple_011_v.jpg	Female Couple	1200	1600	123.425	68.7107	207264	50.7455	-1.9426	1.7339	7.6772
Female_couple_012_v.jpg	Female Couple	1200	1600	145.6083	65.9077	264401	60.0727	9.7176	5.6879	7.4012
Female_couple_013_h.jpg	Female Couple	1600	1200	87.5693	70.4847	289911	36.7765	17.0172	14.2992	7.6096
Female_couple_014_v.jpg	Female Couple	1200	1600	228.7257	24.427	117266	90.9819	6.2396	9.4348	6.1157
Female_couple_015_h.jpg	Female Couple	1600	1200	169.8649	57.4101	194875	69.4021	11.7456	1.9773	7.1944
Female_couple_016_v.jpg	Female Couple	1200	1600	118.8284	63.9728	300648	49.1738	1.4708	5.9342	7.2914
Female_couple_017_h.jpg	Female Couple	1600	1200	104.5781	58.8243	148242	43.855	14.213	10.1026	7.7405
Female_couple_018_h.jpg	Female Couple	1600	1200	51.8215	35.7505	208084	23.527	16.2873	25.2005	6.8114
Female_couple_019_h.jpg	Female Couple	1600	1200	123.0764	66.1754	220216	50.8408	11.3316	7.9337	7.6295
Female_couple_020_h.jpg	Female Couple	1600	1200	111.3205	53.6269	318677	46.5656	9.8237	5.2207	7.6542
Female_couple_021_h.jpg	Female Couple	1600	1200	88.4605	66.1496	286880	36.3945	-2.7413	-5.9268	7.7061
Female_couple_022_h.jpg	Female Couple	1600	1200	140.6708	57.1839	331811	58.3739	11.6727	18.2173	7.7281
Female_couple_023_h.jpg	Female Couple	1600	1200	143.6059	41.2488	118542	60.4586	17.0201	24.6432	7.1911
Female_couple_024_h.jpg	Female Couple	1600	1200	72.9323	64.1682	255675	30.9939	3.3396	19.2545	7.4231
Female_couple_025_h.jpg	Female Couple	1600	1200	140.975	56.3318	194491	58.4976	7.7771	12.0485	7.0165
Female_couple_026_h.jpg	Female Couple	1600	1200	108.723	56.0457	327039	45.8548	6.9471	19.9278	7.5379
Female_couple_027_v.jpg	Female Couple	1200	1600	156.8285	71.6008	264895	63.9555	6.958	7.55	7.7209
Female_couple_028_h.jpg	Female Couple	1600	1200	89.3696	35.0798	427969	37.7901	4.0035	3.34	7.1499
Female_couple_029_h.jpg	Female Couple	1600	1200	142.238	79.9622	226436	58.3059	1.1225	1.2997	7.5014
Female_couple_030_h.jpg	Female Couple	1600	1200	166.8721	68.3681	171540	67.7447	1.7333	-6.3897	7.4374
Female_couple_031_v.jpg	Female Couple	1200	1600	144.1148	69.0956	259490	59.3008	10.0225	8.593	7.7836
Female_couple_032_v.jpg	Female Couple	1200	1600	120.2312	96.7068	213680	48.8159	8.9793	5.0349	7.2275
Female_couple_033_h.jpg	Female Couple	1600	1200	89.743	69.1356	209946	37.2128	9.8358	12.1632	7.5198
Female_couple_034_h.jpg	Female Couple	1600	1200	85.6869	74.2436	204724	34.9875	4.2255	4.0444	7.6364
Female_couple_035_v.jpg	Female Couple	1200	1600	86.2719	66.2764	286836	35.8044	-1.9772	6.4696	7.592
Female_couple_036_h.jpg	Female Couple	1600	1200	53.9736	65.6886	230116	23.0467	11.694	11.6873	6.2307
Female_couple_037_v.jpg	Female Couple	1200	1600	129.8277	62.7184	283220	53.522	5.0183	8.6906	7.8263
Female_couple_038_h.jpg	Female Couple	1600	1200	91.1315	68.4256	278051	37.516	5.409	4.3568	7.6206
Female_couple_039_h.jpg	Female Couple	1600	1200	78.5609	68.1649	296399	32.2232	4.1841	1.9951	7.5506
Female_couple_040_h.jpg	Female Couple	1600	1200	69.7449	72.6572	298001	28.9413	7.8342	16.6628	7.2089
Female_couple_041_h.jpg	Female Couple	1600	1200	113.8354	64.4433	192914	48.0731	17.0093	27.6869	7.4125
Female_couple_042_h.jpg	Female Couple	1600	1200	93.8702	64.6496	293925	39.4932	7.6111	4.8169	7.7381
Female_couple_043_h.jpg	Female Couple	1600	1200	84.9341	69.9213	257481	34.6665	3.7604	1.4162	7.6258
Female_couple_044_h.jpg	Female Couple	1600	1200	76.453	73.5091	214302	31.3581	4.6737	4.6887	7.0572
Female_couple_045_h.jpg	Female Couple	1600	1200	115.1484	75.9634	177549	47.3267	2.6784	3.3767	7.6493
Female_couple_046_h.jpg	Female Couple	1600	1200	122.0962	71.9531	399761	51.9012	17.5438	2.9063	7.838
Female_couple_047_v.jpg	Female Couple	1200	1600	182.3058	52.9045	199467	74.1327	10.4037	9.1102	7.2759
Female_couple_048_h.jpg	Female Couple	1600	1200	50.6014	53.4323	231254	21.284	5.565	6.636	6.7619
Female_couple_049_h.jpg	Female Couple	1600	1200	74.9086	47.4034	231744	32.1391	13.7789	16.9357	7.1982
Female_couple_050_h.jpg	Female Couple	1600	1200	128.7043	60.9886	286893	54.3164	7.9904	7.9747	7.7641
Male_001_v.jpg	Male	1200	1600	146.933	72.0716	265152	60.0397	4.5447	6.449	7.7395
Male_002_v.jpg	Male	1200	1600	103.1037	65.8985	221793	42.743	11.6582	-3.6073	7.7155
Male_003_v.jpg	Male	1200	1600	110.6571	49.4077	228056	46.1739	3.5967	7.3901	7.4926
Male_004_v.jpg	Male	1200	1600	76.7098	68.2319	210323	31.1509	-0.2366	7.0839	7.0933
Male_005_v.jpg	Male	1200	1600	45.0897	43.8873	170084	19.09	11.4089	17.2027	6.7516
Male_006_v.jpg	Male	1200	1600	61.9878	40.1914	206880	26.1872	7.5483	10.2363	7.0614
Male_007_h.jpg	Male	1600	1200	119.5987	54.4775	469938	50.1922	3.1066	14.9059	7.6965
Male_008_v.jpg	Male	1200	1600	118.5186	61.1046	207491	49.8422	14.1516	16.1108	7.609
Male_009_v.jpg	Male	1200	1600	100.9133	60.8704	271374	43.2111	13.4711	15.6762	7.489
Male_010_v.jpg	Male	1200	1600	146.375	67.3991	160848	59.9546	6.5991	11.7406	7.2976
Male_011_v.jpg	Male	1200	1600	97.7019	66.7949	265717	40.2007	8.1808	11.1864	7.44
Male_012_h.jpg	Male	1600	1200	188.8783	43.9723	331233	76.3947	4.1326	8.2885	7.2393
Male_013_v.jpg	Male	1200	1600	106.6658	86.7349	293448	44.0686	11.5375	24.8859	7.4514
Male_014_v.jpg	Male	1200	1600	180.0477	48.9227	151861	73.0604	3.9097	2.0474	7.2601
Male_015_v.jpg	Male	1200	1600	48.8844	76.4888	167601	20.0917	1.4845	8.8924	3.8868
Male_016_v.jpg	Male	1200	1600	119.1188	45.7527	216444	50.2338	12.4281	14.1233	7.4858
Male_017_v.jpg	Male	1200	1600	74.3417	56.3546	276400	31.538	5.2385	7.6499	7.2051
Male_018_v.jpg	Male	1200	1600	138.1733	71.0229	175978	57.09	7.6306	11.6477	7.2597
Male_019_h.jpg	Male	1600	1200	43.1615	33.4787	150728	19.1464	14.2369	16.1964	6.5824
Male_020_v.jpg	Male	1200	1600	190.5202	61.7412	157062	76.8132	4.0439	6.6188	7.1453
Male_021_h.jpg	Male	1600	1200	138.3122	37.3776	326961	57.763	2.6508	1.566	7.1043
Male_022_v.jpg	Male	1200	1600	103.1871	52.5585	257785	43.1253	2.6258	12.346	7.6091
Male_023_v.jpg	Male	1200	1600	120.5579	59.4542	201176	51.0533	12.5798	16.3443	7.7168
Male_024_h.jpg	Male	1600	1200	83.0978	44.1672	201056	35.3457	11.8279	13.8626	7.3268
Male_025_v.jpg	Male	1200	1600	69.5268	60.357	267633	29.0652	2.7805	-0.966	6.8769
Female_001_h.jpg	Female	1600	1200	134.0912	49.2428	249227	58.36	27.1818	10.7039	7.2143
Female_002_h.jpg	Female	1600	1200	78.1128	57.3367	428384	32.6608	0.1224	13.5464	7.5265
Female_003_v.jpg	Female	1200	1600	175.388	54.6216	118707	71.1543	7.0815	2.7069	7.4449
Female_004_v.jpg	Female	1200	1600	164.0815	74.0566	218444	66.2497	2.2245	-3.4638	6.894
Female_005_v.jpg	Female	1200	1600	108.0089	70.3649	270082	44.8525	11.7249	10.9722	7.6863
Female_006_v.jpg	Female	1200	1600	154.6352	63.865	186016	63.1318	2.4502	14.6292	7.7492
Female_007_v.jpg	Female	1200	1600	100.6909	63.1534	138365	41.4323	-1.8072	2.4653	7.4045
Female_008_v.jpg	Female	1200	1600	129.3198	72.8334	155798	52.8173	1.2756	4.492	7.4938
Female_009_h.jpg	Female	1600	1200	101.9035	73.5278	176869	43.0143	11.341	22.514	6.6181
Female_010_h.jpg	Female	1600	1200	46.4594	59.1991	175241	19.4425	9.5547	5.4788	6.5932
Female_011_h.jpg	Female	1600	1200	144.0886	56.5583	142606	59.689	7.0771	8.9211	7.4167
Female_012_v.jpg	Female	1200	1600	140.7359	65.0532	207243	57.6698	4.5309	8.2501	7.8207
Female_013_h.jpg	Female	1600	1200	52.0128	68.6277	137297	21.5101	3.4277	3.1779	4.6639
Female_014_v.jpg	Female	1200	1600	157.1802	76.0052	187483	63.681	5.436	12.6621	7.242
Female_015_v.jpg	Female	1200	1600	159.0171	53.402	171124	65.2389	8.0169	14.7847	7.5418
Female_016_h.jpg	Female	1600	1200	117.3297	37.7359	198286	52.7456	33.7434	20.4305	7.2035
Female_017_v.jpg	Female	1200	1600	72.0917	71.3798	261977	30.0066	11.5136	10.9459	7.3457
Female_018_h.jpg	Female	1600	1200	179.898	38.1936	275330	73.3265	3.457	12.5327	6.9748
Female_019_h.jpg	Female	1600	1200	110.5595	36.3153	254048	48.6266	23.4717	33.9492	7.1507
Female_020_v.jpg	Female	1200	1600	121.2187	36.7955	173444	50.7307	4.4367	4.5166	7.0191
Female_021_h.jpg	Female	1600	1200	152.4576	59.7605	237825	62.5048	8.8278	10.335	7.3816
Female_022_h.jpg	Female	1200	1600	136.3236	63.7769	216160	56.5834	15.4662	4.3765	7.3921
Female_023_h.jpg	Female	1600	1200	52.3322	63.53	214797	20.4158	1.8632	7.0814	6.0347
Female_024_v.jpg	Female	1200	1600	47.3083	55.6639	165161	19.0471	4.39	1.2286	6.7429
Female_025_h.jpg	Female	1600	1200	181.7667	60.3781	216382	73.3617	5.3208	0.3346	7.5139
